# Supplementary material for: Establishing normative data for the evaluation of cognitive performance in Huntington’s disease considering the impact of gender, age, language, and education
Source: PubMed Central journal article supplement (PMC10511566; doi:10.1007/s00415-023-11823-x), 2023-06-22
Supplement: 415_2023_11823_MOESM1_ESM.pdf [file 415_2023_11823_MOESM1_ESM.pdf]

**Supplementary Material Table 1**

| Comparison of models for regression-based z-scores calculation |            |                                |                               |                                |                                |                                |                               |                              |                               |
|----------------------------------------------------------------|------------|--------------------------------|-------------------------------|--------------------------------|--------------------------------|--------------------------------|-------------------------------|------------------------------|-------------------------------|
| Included predictors                                            | Model type | Symbol Digit Modalities Test   | Category Fluency              | Stroop Color Naming            | Stroop Word Reading            | Stroop Interference            | Trail Making Test-A           | Trail Making Test-B          | Letter Fluency                |
| age + edu + lan + gen                                          | LMR        | 23,937.19<br>(112.75)          | 19,964.73<br>(91.61)          | 25,908.32<br>(105.84)          | 27,201.27<br>(110.30)          | 22,784.53<br>(136.48)          | 1,865.05<br>(134.49)          | 2,507.29<br>(89.57)          | 21,101.89<br>(76.94)          |
|                                                                | <b>GAM</b> | <b>23,862.85</b><br>(114.91) * | <b>19,939.03</b><br>(92.36)   | <b>25,863.26</b><br>(107.09) * | <b>27,126.16</b><br>(110.42)   | <b>22,749.68</b><br>(139.96)   | <b>1,801.90</b><br>(137.89) * | <b>2,403.16</b><br>(90.76)   | <b>21,077.55</b><br>(76.96) * |
| age + edu + lan                                                | LMR        | 24,005.04<br>(111.45)          | 19,966.89<br>(91.39)          | 25,911.38<br>(105.85)          | 27,201.41<br>(110.30)          | 22,785.86<br>(136.19)          | 1,864.91<br>(134.09)          | 2,508.28<br>(89.66)          | 21,109.60<br>(76.84)          |
|                                                                | <b>GAM</b> | <b>23,926.45</b><br>(113.56)   | <b>19,938.69</b><br>(92.25) * | <b>25,864.98</b><br>(107.24)   | <b>27,124.15</b><br>(110.46) * | <b>22,749.64</b><br>(139.86) * | <b>1,802.61</b><br>(137.35)   | <b>2,402.11</b><br>(90.84) * | <b>21,083.56</b><br>(76.88)   |
| age + edu + gen                                                | LMR        | 24,083.49<br>(108.82)          | 20,003.53<br>(90.16)          | 25,974.03<br>(105.74)          | 27,271.01<br>(106.67)          | 22,815.86<br>(135.19)          | 2,062.25<br>(125.00)          | 2,706.08<br>(88.95)          | 21,167.00<br>(76.53)          |
|                                                                | <b>GAM</b> | <b>23,983.17</b><br>(111.85)   | <b>19,974.61</b><br>(91.00)   | <b>25,924.09</b><br>(106.59)   | <b>27,201.02</b><br>(107.06)   | <b>22,782.65</b><br>(138.48)   | <b>1,964.28</b><br>(128.84)   | <b>2,559.34</b><br>(89.92)   | <b>21,130.12</b><br>(76.40)   |
| age + lan + gen                                                | LMR        | 24,245.68<br>(111.32)          | 20,138.20<br>(90.66)          | 26,025.43<br>(102.82)          | 27,412.77<br>(107.81)          | 22,939.38<br>(133.40)          | 1,957.77<br>(131.55)          | 2,703.40<br>(90.11)          | 21,337.21<br>(74.75)          |
|                                                                | <b>GAM</b> | <b>24,176.60</b><br>(112.48)   | <b>20,019.18</b><br>(92.00)   | <b>25,974.00</b><br>(104.41)   | <b>27,365.51</b><br>(108.42)   | <b>22,895.64</b><br>(137.06)   | <b>1,895.90</b><br>(135.30)   | <b>2,605.75</b><br>(91.50)   | <b>21,314.24</b><br>(75.21)   |
| edu + lan + gen                                                | LMR        | 24,697.14<br>(101.58)          | 20,019.18<br>(92.00)          | 26,100.68<br>(103.18)          | 27,352.21<br>(107.55)          | 23,244.06<br>(118.61)          | 2,277.46<br>(120.43)          | 2,879.00<br>(88.44)          | 21,099.87<br>(76.85)          |
|                                                                | <b>GAM</b> | <b>24,618.33</b><br>(102.54)   | <b>20,011.37</b><br>(92.09)   | <b>26,075.64</b><br>(103.24)   | <b>27,279.93</b><br>(107.01)   | <b>23,213.89</b><br>(120.26)   | <b>2,227.68</b><br>(120.58)   | <b>2,810.77</b><br>(89.22)   | <b>21,084.19</b><br>(76.72)   |

Note: Values represent leave-one-out information criterion (LOO-IC), and its standard deviation (in brackets), smaller values of LOO-IC indicate better fit; \*models with the best fit according to LOO-IC are presented in bold; edu = education; lan = language; gen = gender; LMR = linear multiple regression; GAM = Generalized Additive Model.

**Supplementary Material Table 2**

| Posterior mean values for each cognitive test stratified by age |                              |                       |                          |                          |                          |                     |                      |                     |
|-----------------------------------------------------------------|------------------------------|-----------------------|--------------------------|--------------------------|--------------------------|---------------------|----------------------|---------------------|
| Age (year)                                                      | Symbol Digit Modalities Test | Category Fluency Test | Stroop Color Naming Test | Stroop Word Reading Test | Stroop Interference Test | Trail Making Test-A | Trail Making Test -B | Letter Fluency Test |
| 20                                                              | 56 [55, 58]                  | 23 [22, 24]           | 78 [76, 80]              | 99 [97, 102]             | 48 [47, 50]              | 22 [21, 23]         | 46 [43, 49]          | 41 [39, 43]         |
| 30                                                              | 55 [54, 56]                  | 23 [22, 23]           | 78 [77, 80]              | 99 [97, 100]             | 47 [46, 48]              | 22 [22, 23]         | 47 [45, 49]          | 42 [40, 43]         |
| 40                                                              | 53 [52, 54]                  | 23 [22, 23]           | 77 [76, 79]              | 98 [96, 100]             | 46 [45, 47]              | 24 [23, 24]         | 48 [46, 51]          | 42 [41, 44]         |
| 50                                                              | 50 [49, 51]                  | 22 [22, 23]           | 76 [74, 77]              | 96 [95, 98]              | 43 [42, 44]              | 25 [25, 26]         | 52 [50, 54]          | 43 [41, 44]         |
| 60                                                              | 46 [45, 47]                  | 22 [21, 22]           | 72 [71, 74]              | 93 [91, 95]              | 39 [38, 41]              | 29 [28, 30]         | 59 [57, 62]          | 42 [41, 43]         |
| 70                                                              | 41 [39, 42]                  | 20 [20, 21]           | 68 [66, 69]              | 88 [86, 90]              | 35 [34, 36]              | 34 [32, 36]         | 73 [70, 78]          | 41 [39, 42]         |
| 80                                                              | 34 [31, 37]                  | 18 [17, 20]           | 62 [58, 65]              | 82 [78, 86]              | 30 [27, 32]              | 43 [39, 47]         | 100 [89, 113]        | 39 [36, 42]         |
| 90                                                              | 27 [21, 32]                  | 16 [13, 19]           | 55 [48, 61]              | 76 [67, 83]              | 24 [18, 29]              | 55 [45, 69]         | 143 [112, 185]       | 37 [30, 42]         |

*Note.* Values represent posterior means and their 95% Posterior Probability Intervals (PPI, in brackets) for different years of age (rows), grand mean for gender and language and education set on sample median (i.e., 14 years).

**Supplementary Material Table 3**

| Posterior mean values for each cognitive test stratified by years of education |                              |                       |                          |                          |                          |                     |                      |                     |
|--------------------------------------------------------------------------------|------------------------------|-----------------------|--------------------------|--------------------------|--------------------------|---------------------|----------------------|---------------------|
| Education (year)                                                               | Symbol Digit Modalities Test | Category Fluency Test | Stroop Color Naming Test | Stroop Word Reading Test | Stroop Interference Test | Trail Making Test-A | Trail Making Test -B | Letter Fluency Test |
| 8                                                                              | 42 [40, 43]                  | 20 [19, 21]           | 70 [68, 72]              | 86 [84, 89]              | 38 [37, 40]              | 30 [28, 32]         | 69 [65, 74]          | 34 [32, 36]         |
| 10                                                                             | 46 [44, 47]                  | 21 [20, 21]           | 72 [71, 74]              | 91 [89, 93]              | 40 [39, 41]              | 27 [26, 29]         | 61 [58, 64]          | 37 [36, 39]         |
| 12                                                                             | 48 [47, 49]                  | 22 [21, 22]           | 74 [73, 76]              | 94 [93, 96]              | 42 [41, 43]              | 26 [25, 27]         | 55 [53, 58]          | 40 [39, 41]         |
| 14                                                                             | 50 [49, 51]                  | 23 [22, 23]           | 76 [75, 77]              | 97 [95, 98]              | 44 [43, 45]              | 25 [24, 26]         | 51 [49, 53]          | 43 [41, 44]         |
| 16                                                                             | 52 [51, 53]                  | 23 [23, 24]           | 78 [76, 79]              | 100 [98, 101]            | 45 [44, 46]              | 24 [23, 25]         | 48 [46, 50]          | 45 [44, 46]         |
| 18                                                                             | 53 [52, 54]                  | 24 [23, 25]           | 79 [77, 80]              | 102 [100, 104]           | 46 [45, 48]              | 23 [22, 24]         | 46 [44, 48]          | 47 [45, 48]         |
| 20                                                                             | 55 [53, 56]                  | 25 [24, 25]           | 80 [78, 81]              | 103 [101, 105]           | 47 [46, 49]              | 23 [22, 24]         | 45 [43, 47]          | 48 [46, 49]         |
| 22                                                                             | 56 [54, 57]                  | 25 [24, 26]           | 81 [79, 83]              | 103 [100, 106]           | 48 [46, 49]              | 23 [22, 25]         | 45 [42, 48]          | 49 [47, 51]         |

Note. Values represent posterior means and their 95% Posterior Probability Intervals (PPI, in brackets) for different years of education (rows), grand mean for gender and language and age set on sample median (i.e, 48 years);

**Supplementary Material Table 4**

Means and standard deviations for each cognitive test for the whole sample (N = 3,267) stratified by age, education, and gender

|                                        | Age Groups       |                   |                   |                   |                   |                   |                  |                  |                  |                  |                  |                  |                  |                  |                  |                  |                  |                  |
|----------------------------------------|------------------|-------------------|-------------------|-------------------|-------------------|-------------------|------------------|------------------|------------------|------------------|------------------|------------------|------------------|------------------|------------------|------------------|------------------|------------------|
|                                        | 18-34 years      |                   |                   | 35-44 years       |                   |                   | 45-54 years      |                  |                  | 55-64 years      |                  |                  | > 64 years       |                  |                  | Total            |                  |                  |
|                                        | female           | male              | all               | female            | male              | all               | female           | male             | all              | female           | male             | all              | female           | male             | all              | female           | male             | all              |
| <b>Symbol Digit Modalities Test</b>    |                  |                   |                   |                   |                   |                   |                  |                  |                  |                  |                  |                  |                  |                  |                  |                  |                  |                  |
| ≤ 12 education years                   | 52.94<br>(11.36) | 50.32<br>(9.58)   | 51.73<br>(10.62)  | 50.97<br>(12.24)  | 48.27<br>(12.01)  | 49.63<br>(12.15)  | 47.85<br>(10.93) | 43.37<br>(9.61)  | 46.07<br>(10.63) | 43.81<br>(11.51) | 40.98<br>(11.48) | 42.96<br>(11.55) | 34.94<br>(11.95) | 34.82<br>(9.79)  | 34.89<br>(11.02) | 45.77<br>(12.89) | 43.72<br>(11.78) | 44.93<br>(12.49) |
| > 12 education years                   | 58.52<br>(9.76)  | 56.00<br>(10.69)  | 57.59<br>(10.17)  | 56.69<br>(9.66)   | 53.37<br>(9.11)   | 55.41<br>(9.58)   | 53.2<br>(10.17)  | 50.76<br>(9.15)  | 52.29<br>(9.86)  | 50.27<br>(10.27) | 47.25<br>(9.29)  | 49.12<br>(10.00) | 45.41<br>(9.19)  | 42.67<br>(9.28)  | 44.05<br>(9.32)  | 54.07<br>(10.68) | 50.79<br>(10.55) | 52.79<br>(10.75) |
| total                                  | 57.52<br>(10.27) | 54.63<br>(10.7)   | 56.40<br>(10.53)  | 55.66<br>(10.4)   | 52.06<br>(10.16)  | 54.18<br>(10.44)  | 51.86<br>(10.61) | 48.78<br>(9.82)  | 50.69<br>(10.42) | 48.1<br>(11.12)  | 45.62<br>(10.26) | 47.21<br>(10.88) | 41.32<br>(11.53) | 40.03<br>(10.14) | 40.70<br>(10.89) | 51.96<br>(11.85) | 48.89<br>(11.33) | 50.75<br>(11.74) |
| <b>Category Fluency Test (Animals)</b> |                  |                   |                   |                   |                   |                   |                  |                  |                  |                  |                  |                  |                  |                  |                  |                  |                  |                  |
| ≤ 12 education years                   | 20.67<br>(4.95)  | 21.09<br>(6.28)   | 20.87<br>(5.6)    | 21.55<br>(5.35)   | 19.74<br>(5.18)   | 20.65<br>(5.32)   | 20.52<br>(4.90)  | 21.00<br>(5.93)  | 20.71<br>(5.33)  | 20.58<br>(5.42)  | 21.12<br>(5.27)  | 20.74<br>(5.37)  | 18.04<br>(5.46)  | 19.31<br>(5.40)  | 18.60<br>(5.45)  | 20.28<br>(5.31)  | 20.48<br>(5.67)  | 20.36<br>(5.46)  |
| > 12 education years                   | 23.56<br>(5.15)  | 23.26<br>(5.44)   | 23.45<br>(5.25)   | 23.48<br>(5.34)   | 22.84<br>(5.45)   | 23.23<br>(5.39)   | 23.19<br>(5.31)  | 22.94<br>(5.38)  | 23.09<br>(5.33)  | 22.57<br>(5.77)  | 22.47<br>(5.05)  | 22.53<br>(5.5)   | 21.39<br>(4.88)  | 20.57<br>(5.37)  | 20.98<br>(5.13)  | 23.06<br>(5.36)  | 22.58<br>(5.40)  | 22.87<br>(5.38)  |
| total                                  | 23.05<br>(5.22)  | 22.73<br>(5.72)   | 22.93<br>(5.42)   | 23.13<br>(5.39)   | 22.04<br>(5.54)   | 22.68<br>(5.47)   | 22.52<br>(5.33)  | 22.41<br>(5.59)  | 22.48<br>(5.43)  | 21.89<br>(5.72)  | 22.12<br>(5.14)  | 21.97<br>(5.52)  | 20.07<br>(5.36)  | 20.14<br>(5.40)  | 20.10<br>(5.37)  | 22.35<br>(5.48)  | 22.01<br>(5.55)  | 22.22<br>(5.51)  |
| <b>Stroop Color Naming Test</b>        |                  |                   |                   |                   |                   |                   |                  |                  |                  |                  |                  |                  |                  |                  |                  |                  |                  |                  |
| ≤ 12 education years                   | 73.21<br>(13.19) | 79.51<br>(14.45)  | 76.14<br>(14.11)  | 73.57<br>(13.91)  | 71.94<br>(13.75)  | 72.76<br>(13.8)   | 73.43<br>(13.57) | 70.74<br>(14.36) | 72.35<br>(13.91) | 70.18<br>(12.44) | 67.45<br>(13.81) | 69.38<br>(12.89) | 62.12<br>(13.96) | 63.9<br>(11.38)  | 62.9<br>(12.88)  | 70.52<br>(13.85) | 70.93<br>(14.54) | 70.69<br>(14.13) |
| > 12 education years                   | 79.03<br>(12.34) | 79.92<br>(13.04)  | 79.35<br>(12.6)   | 79.99<br>(13.7)   | 77.58<br>(14.69)  | 79.06<br>(14.13)  | 76.72<br>(13.34) | 76.77<br>(14.26) | 76.74<br>(13.67) | 78.01<br>(13.77) | 73.96<br>(13.93) | 76.46<br>(13.96) | 70.42<br>(11.23) | 67.92<br>(13.06) | 69.19<br>(12.21) | 77.71<br>(13.3)  | 75.94<br>(14.31) | 77.03<br>(13.72) |
| total                                  | 78.00<br>(12.68) | 79.82<br>(13.38)  | 78.70<br>(12.98)  | 78.83<br>(13.94)  | 76.13<br>(14.64)  | 77.72<br>(14.28)  | 75.9<br>(13.46)  | 75.12<br>(14.51) | 75.61<br>(13.86) | 75.33<br>(13.83) | 72.29<br>(14.16) | 74.25<br>(14.01) | 67.15<br>(13.00) | 66.54<br>(12.62) | 66.86<br>(12.81) | 75.88<br>(13.8)  | 74.58<br>(14.54) | 75.37<br>(14.11) |
| <b>Stroop Word Reading Test</b>        |                  |                   |                   |                   |                   |                   |                  |                  |                  |                  |                  |                  |                  |                  |                  |                  |                  |                  |
| ≤ 12 education years                   | 94.31<br>(15.44) | 99.66<br>(19.36)  | 96.8<br>(17.52)   | 93.13<br>(16.87)  | 92.42<br>(15.94)  | 92.78<br>(16.36)  | 92.81<br>(15.63) | 89.61<br>(16.11) | 91.53<br>(15.86) | 90.43<br>(17.86) | 87.59<br>(17.00) | 89.59<br>(17.62) | 81.04<br>(17.84) | 81.82<br>(13.86) | 81.38<br>(16.16) | 90.4<br>(17.35)  | 90.42<br>(17.53) | 90.40<br>(17.42) |
| > 12 education years                   | 99.65<br>(15.6)  | 102.35<br>(14.51) | 100.64<br>(15.25) | 101.86<br>(16.72) | 100.18<br>(17.43) | 101.21<br>(17.00) | 99.38<br>(16.59) | 98.85<br>(16.6)  | 99.18<br>(16.58) | 97.57<br>(16.3)  | 95.18<br>(17.05) | 96.66<br>(16.62) | 91.34<br>(13.00) | 89.25<br>(17.33) | 90.31<br>(15.30) | 98.89<br>(16.21) | 97.96<br>(16.98) | 98.53<br>(16.52) |
| total                                  | 98.71<br>(15.69) | 101.69<br>(15.84) | 99.86<br>(15.80)  | 100.28<br>(17.06) | 98.19<br>(17.36)  | 99.42<br>(17.2)   | 97.74<br>(16.58) | 96.34<br>(16.95) | 97.21<br>(16.72) | 95.13<br>(17.17) | 93.21<br>(17.33) | 94.45<br>(17.24) | 87.28<br>(15.87) | 86.70<br>(16.57) | 87.00<br>(16.19) | 96.72<br>(16.92) | 95.92<br>(17.45) | 96.41<br>(17.13) |

**Stroop Interference Test**

|                      |                  |                  |                  |                  |                  |                  |                  |                 |                 |                 |                  |                  |                  |                  |                  |                  |                  |                  |
|----------------------|------------------|------------------|------------------|------------------|------------------|------------------|------------------|-----------------|-----------------|-----------------|------------------|------------------|------------------|------------------|------------------|------------------|------------------|------------------|
| ≤ 12 education years | 44.13<br>(10.15) | 46.45<br>(9.48)  | 45.22<br>(9.88)  | 42.25<br>(12.04) | 41.12<br>(9.69)  | 41.67<br>(10.87) | 40.81<br>(7.74)  | 38.82<br>(9.23) | 40.01<br>(8.4)  | 38.54<br>(9.72) | 38.03<br>(10.21) | 38.39<br>(9.85)  | 32.08<br>(11.53) | 29.68<br>(9.20)  | 31.04<br>(10.62) | 39.44<br>(10.73) | 39.17<br>(10.94) | 39.33<br>(10.81) |
| > 12 education years | 48.48<br>(10.55) | 49.57<br>(10.87) | 48.88<br>(10.67) | 46.70<br>(8.94)  | 46.25<br>(11.19) | 46.53<br>(9.86)  | 44.13<br>(10.06) | 44.00<br>(9.84) | 44.08<br>(9.97) | 42.73<br>(9.66) | 40.95<br>(12.22) | 42.05<br>(10.74) | 36.80<br>(8.99)  | 35.53<br>(11.05) | 36.18<br>(10.05) | 44.91<br>(10.34) | 44.12<br>(11.88) | 44.60<br>(10.97) |
| total                | 47.69<br>(10.6)  | 48.78<br>(10.61) | 48.12<br>(10.61) | 45.91<br>(9.69)  | 44.90<br>(11.03) | 45.49<br>(10.27) | 43.33<br>(9.65)  | 42.62<br>(9.93) | 43.06<br>(9.76) | 41.33<br>(9.87) | 40.20<br>(11.78) | 40.93<br>(10.60) | 34.96<br>(10.29) | 33.55<br>(10.8)  | 34.3<br>(10.54)  | 43.53<br>(10.71) | 42.77<br>(11.83) | 43.23<br>(11.17) |

**Trail Making Test – Part A**

|                      |                 |                  |                  |                  |                  |                  |                  |                  |                  |                  |                  |                  |                  |                  |                  |                  |                  |                  |
|----------------------|-----------------|------------------|------------------|------------------|------------------|------------------|------------------|------------------|------------------|------------------|------------------|------------------|------------------|------------------|------------------|------------------|------------------|------------------|
| ≤ 12 education years | 26.66<br>(9.28) | 24.67<br>(7.94)  | 25.73<br>(8.71)  | 25.32<br>(8.91)  | 26.45<br>(11.23) | 25.9<br>(10.14)  | 29.61<br>(11.77) | 34.51<br>(37.98) | 31.59<br>(25.79) | 32.21<br>(12.43) | 36.93<br>(32.92) | 33.71<br>(21.19) | 44.91<br>(25.42) | 37.86<br>(14.79) | 41.87<br>(21.71) | 31.92<br>(15.92) | 31.83<br>(24.72) | 31.88<br>(20.05) |
| > 12 education years | 22.89<br>(8.69) | 22.18<br>(12.39) | 22.62<br>(10.23) | 25.08<br>(21.12) | 23.10<br>(7.82)  | 24.32<br>(17.28) | 25.49<br>(9.43)  | 24.51<br>(10.64) | 25.13<br>(9.89)  | 27.35<br>(9.82)  | 26.70<br>(7.93)  | 27.11<br>(9.16)  | 30.82<br>(9.88)  | 34.41<br>(17.32) | 32.52<br>(13.98) | 25.53<br>(12.77) | 25.28<br>(11.87) | 25.44<br>(12.43) |
| total                | 23.57<br>(8.91) | 22.79<br>(11.5)  | 23.26<br>(10.01) | 25.12<br>(19.42) | 24.03<br>(9.00)  | 24.67<br>(15.96) | 26.51<br>(10.2)  | 27.3<br>(22.35)  | 26.81<br>(15.87) | 28.94<br>(10.97) | 29.49<br>(18.93) | 29.13<br>(14.31) | 36.51<br>(19.11) | 35.66<br>(16.48) | 36.12<br>(17.93) | 27.16<br>(13.92) | 27.12<br>(16.77) | 27.14<br>(15.10) |

**Trail Making Test – Part B**

|                      |                  |                  |                  |                  |                  |                  |                  |                  |                  |                  |                  |                  |                  |                  |                   |                  |                  |                  |
|----------------------|------------------|------------------|------------------|------------------|------------------|------------------|------------------|------------------|------------------|------------------|------------------|------------------|------------------|------------------|-------------------|------------------|------------------|------------------|
| ≤ 12 education years | 57.43<br>(31.54) | 60.97<br>(33.44) | 59.09<br>(32.38) | 51.89<br>(21.43) | 59.38<br>(22.86) | 55.74<br>(22.40) | 72.66<br>(41.62) | 68.6<br>(43.68)  | 71.02<br>(42.37) | 70.18<br>(36.88) | 78.58<br>(49.15) | 72.85<br>(41.23) | 111.47<br>(63.2) | 93.34<br>(47.67) | 103.66<br>(57.53) | 73.2<br>(45.43)  | 71.52<br>(41.88) | 72.50<br>(43.96) |
| > 12 education years | 45.53<br>(19.15) | 47.33<br>(22.7)  | 46.21<br>(20.55) | 47.82<br>(24.59) | 50.81<br>(22.59) | 48.98<br>(23.85) | 51.46<br>(22.67) | 49.61<br>(21.00) | 50.78<br>(22.07) | 54.64<br>(22.71) | 56.81<br>(27.76) | 55.45<br>(24.71) | 70.39<br>(36.1)  | 72.97<br>(38.33) | 71.61<br>(37.10)  | 51.41<br>(24.58) | 53.57<br>(26.97) | 52.24<br>(25.54) |
| total                | 47.69<br>(22.35) | 50.68<br>(26.35) | 48.87<br>(24.03) | 48.58<br>(24.05) | 53.19<br>(22.94) | 50.50<br>(23.68) | 56.72<br>(29.94) | 54.93<br>(30.30) | 56.05<br>(30.06) | 59.67<br>(28.97) | 62.72<br>(36.08) | 60.76<br>(31.70) | 87.01<br>(52.76) | 80.42<br>(42.98) | 84.01<br>(48.59)  | 56.96<br>(32.64) | 58.62<br>(32.87) | 57.61<br>(32.73) |

**Letter Fluency Test Total (the sum of all three letters)**

|                      |                  |                  |                  |                  |                  |                  |                  |                  |                  |                  |                  |                  |                  |                  |                  |                  |                  |                  |
|----------------------|------------------|------------------|------------------|------------------|------------------|------------------|------------------|------------------|------------------|------------------|------------------|------------------|------------------|------------------|------------------|------------------|------------------|------------------|
| ≤ 12 education years | 38.01<br>(10.3)  | 33.78<br>(11.71) | 36.06<br>(11.13) | 37.22<br>(10.23) | 35.2<br>(11.89)  | 36.17<br>(11.12) | 37.28<br>(11.1)  | 36.92<br>(12.04) | 37.14<br>(11.45) | 37.88<br>(10.79) | 38.35<br>(13.77) | 38.02<br>(11.75) | 32.41<br>(12.27) | 34.55<br>(13.47) | 33.32<br>(12.79) | 36.73<br>(11.11) | 35.72<br>(12.57) | 36.31<br>(11.74) |
| > 12 education years | 43.25<br>(11.25) | 42.89<br>(11.76) | 43.12<br>(11.43) | 44.92<br>(12.36) | 42.93<br>(10.45) | 44.15<br>(11.69) | 43.33<br>(12.69) | 43.15<br>(11.75) | 43.26<br>(12.34) | 45.52<br>(11.86) | 42.26<br>(12.66) | 44.29<br>(12.25) | 43.97<br>(11.87) | 40.64<br>(14.74) | 42.42<br>(13.36) | 44.12<br>(12.01) | 42.56<br>(12.09) | 43.52<br>(12.06) |
| total                | 42.3<br>(11.25)  | 40.68<br>(12.36) | 41.67<br>(11.72) | 43.5<br>(12.35)  | 40.76<br>(11.39) | 42.36<br>(12.02) | 41.83<br>(12.58) | 41.44<br>(12.13) | 41.68<br>(12.4)  | 42.98<br>(12.05) | 41.2<br>(13.05)  | 42.35<br>(12.43) | 39.27<br>(13.28) | 38.39<br>(14.54) | 38.87<br>(13.85) | 42.23<br>(12.22) | 40.64<br>(12.6)  | 41.61<br>(12.39) |

**Letter Fluency Test - 1. Letter**

|                      |                 |                 |                 |                 |                 |                 |                 |                 |                 |                 |                 |                 |                 |                 |                 |                 |                 |                 |
|----------------------|-----------------|-----------------|-----------------|-----------------|-----------------|-----------------|-----------------|-----------------|-----------------|-----------------|-----------------|-----------------|-----------------|-----------------|-----------------|-----------------|-----------------|-----------------|
| ≤ 12 education years | 13.37<br>(4.22) | 11.48<br>(4.15) | 12.50<br>(4.28) | 13.64<br>(4.07) | 11.90<br>(4.66) | 12.73<br>(4.46) | 12.81<br>(4.37) | 12.66<br>(4.36) | 12.75<br>(4.35) | 12.89<br>(4.53) | 13.27<br>(5.26) | 13.01<br>(4.76) | 11.23<br>(4.87) | 12.00<br>(4.82) | 11.56<br>(4.84) | 12.77<br>(4.49) | 12.24<br>(4.65) | 12.55<br>(4.56) |
| > 12 education years | 14.96<br>(4.56) | 14.80<br>(4.65) | 14.90<br>(4.59) | 15.33<br>(4.89) | 15.07<br>(4.43) | 15.23<br>(4.71) | 14.86<br>(4.85) | 14.97<br>(4.76) | 14.9<br>(4.81)  | 15.49<br>(4.86) | 14.34<br>(4.84) | 15.06<br>(4.88) | 15.14<br>(5.03) | 14.17<br>(6.02) | 14.69<br>(5.52) | 15.13<br>(4.80) | 14.73<br>(4.85) | 14.98<br>(4.82) |
| total                | 14.67<br>(4.54) | 14.00<br>(4.74) | 14.41<br>(4.63) | 15.02<br>(4.79) | 14.19<br>(4.71) | 14.67<br>(4.77) | 14.36<br>(4.81) | 14.34<br>(4.75) | 14.35<br>(4.79) | 14.63<br>(4.90) | 14.05<br>(4.97) | 14.42<br>(4.93) | 13.55<br>(5.31) | 13.37<br>(5.69) | 13.47<br>(5.48) | 14.53<br>(4.83) | 14.03<br>(4.92) | 14.33<br>(4.87) |

**Letter Fluency Test - 2. Letter**

|                                        |                 |                 |                 |                 |                 |                 |                 |                 |                 |                 |                 |                 |                 |                 |                 |                 |                 |                 |
|----------------------------------------|-----------------|-----------------|-----------------|-----------------|-----------------|-----------------|-----------------|-----------------|-----------------|-----------------|-----------------|-----------------|-----------------|-----------------|-----------------|-----------------|-----------------|-----------------|
| ≤ 12 education years                   | 11.58<br>(3.67) | 10.35<br>(4.25) | 11.01<br>(3.98) | 11.24<br>(4.43) | 10.68<br>(4.44) | 10.95<br>(4.43) | 11.66<br>(4.20) | 11.35<br>(4.43) | 11.54<br>(4.28) | 11.33<br>(4.08) | 11.51<br>(4.73) | 11.38<br>(4.28) | 9.99<br>(4.45)  | 10.18<br>(5.23) | 10.07<br>(4.78) | 11.20<br>(4.17) | 10.82<br>(4.61) | 11.04<br>(4.36) |
| > 12 education years                   | 13.06<br>(4.18) | 13.06<br>(4.32) | 13.06<br>(4.23) | 13.55<br>(4.86) | 12.99<br>(4.52) | 13.34<br>(4.73) | 13.32<br>(4.52) | 13.26<br>(4.51) | 13.3<br>(4.51)  | 13.97<br>(4.38) | 12.81<br>(4.39) | 13.53<br>(4.41) | 13.22<br>(4.06) | 12.54<br>(5.00) | 12.91<br>(4.52) | 13.41<br>(4.43) | 12.98<br>(4.49) | 13.25<br>(4.46) |
| total                                  | 12.79<br>(4.13) | 12.41<br>(4.45) | 12.64<br>(4.26) | 13.13<br>(4.86) | 12.35<br>(4.61) | 12.8<br>(4.77)  | 12.91<br>(4.49) | 12.74<br>(4.56) | 12.84<br>(4.51) | 13.09<br>(4.45) | 12.46<br>(4.51) | 12.87<br>(4.48) | 11.91<br>(4.50) | 11.67<br>(5.19) | 11.8<br>(4.82)  | 12.85<br>(4.47) | 12.38<br>(4.63) | 12.66<br>(4.54) |
| <b>Letter Fluency Test - 3. Letter</b> |                 |                 |                 |                 |                 |                 |                 |                 |                 |                 |                 |                 |                 |                 |                 |                 |                 |                 |
| ≤ 12 education years                   | 13.07<br>(5.08) | 11.95<br>(5.00) | 12.55<br>(5.06) | 12.35<br>(4.07) | 12.62<br>(4.78) | 12.49<br>(4.44) | 12.81<br>(4.55) | 12.91<br>(5.11) | 12.85<br>(4.77) | 13.66<br>(4.38) | 13.56<br>(5.82) | 13.63<br>(4.85) | 11.19<br>(4.67) | 12.36<br>(5.49) | 11.69<br>(5.05) | 12.76<br>(4.62) | 12.66<br>(5.23) | 12.72<br>(4.88) |
| > 12 education years                   | 15.24<br>(4.74) | 15.02<br>(5.06) | 15.16<br>(4.86) | 16.00<br>(4.95) | 14.81<br>(4.03) | 15.54<br>(4.65) | 15.15<br>(5.02) | 14.91<br>(4.74) | 15.06<br>(4.92) | 16.05<br>(4.78) | 15.11<br>(5.08) | 15.70<br>(4.91) | 15.61<br>(4.53) | 13.93<br>(5.50) | 14.83<br>(5.06) | 15.57<br>(4.85) | 14.84<br>(4.86) | 15.29<br>(4.86) |
| total                                  | 14.84<br>(4.87) | 14.28<br>(5.20) | 14.62<br>(5.01) | 15.33<br>(5.00) | 14.19<br>(4.36) | 14.86<br>(4.77) | 14.57<br>(5.01) | 14.36<br>(4.92) | 14.49<br>(4.97) | 15.26<br>(4.78) | 14.70<br>(5.32) | 15.06<br>(4.98) | 13.81<br>(5.06) | 13.35<br>(5.53) | 13.60<br>(5.28) | 14.85<br>(4.94) | 14.23<br>(5.06) | 14.61<br>(5.00) |

Note. Symbol Digit Modalities Test (min.-max.: 0–110 points in 90 sec); Category fluency (number of correct words - animals in 60 sec); Stroop in each test (min.-max.: 0–200 in 45 sec); Trail Making Test, Part A and Part B (Both time in sec, max. 240 sec, the longer time elapsed, the worse performance); Letter fluency test (number of correct words for three letters in 60 sec each, i.e. in total 180 sec).

**Supplementary Material Table 5**

Means and standard deviations for each cognitive test for the English sample stratified by age, education, and gender

|                                           | Age Group        |                   |                  |                   |                  |                   |                  |                  |                  |                  |                  |                  |                  |                  |                  |                  |                  |                  |
|-------------------------------------------|------------------|-------------------|------------------|-------------------|------------------|-------------------|------------------|------------------|------------------|------------------|------------------|------------------|------------------|------------------|------------------|------------------|------------------|------------------|
|                                           | 18-34 years      |                   |                  | 35-44 years       |                  |                   | 45-54 years      |                  |                  | 55-64 years      |                  |                  | > 64 years       |                  |                  | Total            |                  |                  |
|                                           | female           | male              | all              | female            | male             | all               | female           | male             | all              | female           | male             | all              | female           | male             | all              | female           | male             | all              |
| <b>Symbol Digit Modalities Test</b>       |                  |                   |                  |                   |                  |                   |                  |                  |                  |                  |                  |                  |                  |                  |                  |                  |                  |                  |
| ≤ 12 education years                      | 58.09<br>(9.6)   | 51.06<br>(9.08)   | 54.79<br>(9.93)  | 51.11<br>(14.27)  | 50.77<br>(13.93) | 50.93<br>(13.97)  | 52.33<br>(8.03)  | 45.52<br>(8.19)  | 49.45<br>(8.73)  | 48.55<br>(10.12) | 43.74<br>(12.6)  | 46.87<br>(11.23) | 41.47<br>(9.42)  | 38.91<br>(8.91)  | 40.23<br>(9.2)   | 50.17<br>(11.26) | 45.86<br>(11.56) | 48.29<br>(11.57) |
| > 12 education years                      | 58.95<br>(9.55)  | 57.96<br>(10.69)  | 58.59<br>(9.96)  | 58.11<br>(9.43)   | 54.41<br>(8.14)  | 56.85<br>(9.17)   | 54.71<br>(9.36)  | 52.63<br>(8.34)  | 53.92<br>(9.02)  | 51.55<br>(9.66)  | 48.36<br>(9.58)  | 50.46<br>(9.73)  | 46.87<br>(8.98)  | 43.62<br>(8.51)  | 45.33<br>(8.89)  | 54.72<br>(10.25) | 51.63<br>(10.4)  | 53.57<br>(10.41) |
| total                                     | 58.83<br>(9.54)  | 56.55<br>(10.72)  | 57.98<br>(10.05) | 57.14<br>(10.48)  | 53.5<br>(9.97)   | 55.78<br>(10.43)  | 54.25<br>(9.15)  | 51.05<br>(8.8)   | 53.0<br>(9.13)   | 50.85<br>(9.83)  | 47.25<br>(10.52) | 49.62<br>(10.21) | 45.56<br>(9.35)  | 42.45<br>(8.82)  | 44.07<br>(9.21)  | 53.87<br>(10.59) | 50.29<br>(10.94) | 52.49<br>(10.87) |
| <b>Categorical Fluency Test (Animals)</b> |                  |                   |                  |                   |                  |                   |                  |                  |                  |                  |                  |                  |                  |                  |                  |                  |                  |                  |
| ≤ 12 education years                      | 21.11<br>(4.84)  | 23.35<br>(6.13)   | 22.17<br>(5.56)  | 21.18<br>(6.49)   | 20.03<br>(5.24)  | 20.59<br>(5.85)   | 21.33<br>(4.31)  | 21.21<br>(4.99)  | 21.28<br>(4.58)  | 20.24<br>(5.11)  | 20.94<br>(5.26)  | 20.49<br>(5.15)  | 18.74<br>(4.72)  | 20.22<br>(5.75)  | 19.45<br>(5.25)  | 20.5<br>(5.08)   | 21.15<br>(5.54)  | 20.79<br>(5.29)  |
| > 12 education years                      | 23.67<br>(5.35)  | 23.74<br>(5.02)   | 23.7<br>(5.23)   | 23.25<br>(5.61)   | 22.82<br>(5.4)   | 23.1<br>(5.53)    | 22.45<br>(4.7)   | 22.96<br>(5.28)  | 22.64<br>(4.93)  | 22.07<br>(5.63)  | 22.54<br>(4.69)  | 22.23<br>(5.32)  | 21.33<br>(4.64)  | 20.79<br>(5.52)  | 21.07<br>(5.07)  | 22.68<br>(5.31)  | 22.64<br>(5.24)  | 22.66<br>(5.28)  |
| total                                     | 23.32<br>(5.35)  | 23.66<br>(5.25)   | 23.45<br>(5.31)  | 22.96<br>(5.77)   | 22.12<br>(5.47)  | 22.65<br>(5.67)   | 22.23<br>(4.64)  | 22.57<br>(5.25)  | 22.36<br>(4.88)  | 21.63<br>(5.56)  | 22.16<br>(4.86)  | 21.82<br>(5.33)  | 20.7<br>(4.77)   | 20.65<br>(5.56)  | 20.68<br>(5.15)  | 22.27<br>(5.34)  | 22.29<br>(5.34)  | 22.28<br>(5.34)  |
| <b>Stroop Color Naming Test</b>           |                  |                   |                  |                   |                  |                   |                  |                  |                  |                  |                  |                  |                  |                  |                  |                  |                  |                  |
| ≤ 12 education years                      | 74.32<br>(15.07) | 82.61<br>(17.75)  | 78.28<br>(16.8)  | 74.93<br>(13.09)  | 71.9<br>(14.91)  | 73.36<br>(14.02)  | 76.29<br>(12.02) | 71.03<br>(12.08) | 74.06<br>(12.25) | 71.95<br>(12.99) | 69.33<br>(14.76) | 71.08<br>(13.59) | 66.09<br>(15.33) | 65.31<br>(9.98)  | 65.71<br>(12.92) | 72.72<br>(13.85) | 71.95<br>(15.06) | 72.39<br>(14.37) |
| > 12 education years                      | 79.82<br>(11.57) | 82.32<br>(14.17)  | 80.7<br>(12.58)  | 82.28<br>(14.79)  | 78.42<br>(17.29) | 80.97<br>(15.76)  | 77.34<br>(14.01) | 78.85<br>(14.29) | 77.92<br>(14.11) | 79.12<br>(14.38) | 75.25<br>(14.21) | 77.79<br>(14.42) | 71.21<br>(11.07) | 69.41<br>(12.13) | 70.36<br>(11.59) | 78.6<br>(13.72)  | 77.1<br>(15.03)  | 78.04<br>(14.23) |
| total                                     | 79.08<br>(12.21) | 82.38<br>(14.92)  | 80.31<br>(13.36) | 81.26<br>(14.76)  | 76.79<br>(16.91) | 79.6<br>(15.72)   | 77.14<br>(13.63) | 77.1<br>(14.17)  | 77.12<br>(13.82) | 77.41<br>(14.37) | 73.88<br>(14.5)  | 76.2<br>(14.49)  | 69.96<br>(12.38) | 68.38<br>(11.73) | 69.21<br>(12.08) | 77.5<br>(13.93)  | 75.91<br>(15.18) | 76.89<br>(14.44) |
| <b>Stroop Word Reading Test</b>           |                  |                   |                  |                   |                  |                   |                  |                  |                  |                  |                  |                  |                  |                  |                  |                  |                  |                  |
| ≤ 12 education years                      | 94.18<br>(15.98) | 101.42<br>(23.68) | 97.63<br>(20.19) | 89.36<br>(17.14)  | 86.97<br>(15.86) | 88.12<br>(16.39)  | 93.22<br>(15.78) | 84.39<br>(14.71) | 89.49<br>(15.86) | 90.85<br>(17.43) | 86.53<br>(17.72) | 89.38<br>(17.56) | 85.44<br>(13.67) | 82.25<br>(12.73) | 83.89<br>(13.22) | 90.82<br>(16.33) | 88.2<br>(18.36)  | 89.68<br>(17.27) |
| > 12 education years                      | 98.4<br>(15.62)  | 102.75<br>(13.4)  | 99.93<br>(15)    | 101.03<br>(18.08) | 98.31<br>(17.42) | 100.11<br>(17.87) | 98.4<br>(16.97)  | 99.01<br>(17.47) | 98.63<br>(17.14) | 97.81<br>(16.75) | 94.15<br>(16.5)  | 96.55<br>(16.73) | 90.93<br>(13.29) | 89.18<br>(16.33) | 90.11<br>(14.78) | 97.89<br>(16.63) | 96.97<br>(16.79) | 97.55<br>(16.69) |
| total                                     | 97.83<br>(15.71) | 102.47<br>(15.98) | 99.56<br>(15.95) | 99.42<br>(18.36)  | 95.47<br>(17.68) | 97.95<br>(18.18)  | 97.39<br>(16.84) | 95.75<br>(17.92) | 96.75<br>(17.26) | 96.14<br>(17.14) | 92.35<br>(17.05) | 94.85<br>(17.18) | 89.6<br>(13.54)  | 87.42<br>(15.74) | 88.57<br>(14.63) | 96.56<br>(16.79) | 94.93<br>(17.55) | 95.94<br>(17.1)  |

**Stroop Interference Test**

|                      |                  |                  |                  |                  |                  |                  |                 |                 |                 |                 |                  |                  |                 |                  |                 |                  |                  |                  |
|----------------------|------------------|------------------|------------------|------------------|------------------|------------------|-----------------|-----------------|-----------------|-----------------|------------------|------------------|-----------------|------------------|-----------------|------------------|------------------|------------------|
| ≤ 12 education years | 45.31<br>(7.41)  | 46.81<br>(9.38)  | 46.05<br>(8.4)   | 40.48<br>(16.35) | 41.11<br>(8.69)  | 40.82<br>(12.59) | 42.41<br>(6.16) | 37.45<br>(6.47) | 40.21<br>(6.73) | 39.05<br>(8.16) | 38.84<br>(11.25) | 38.98<br>(9.28)  | 34.47<br>(8.88) | 33.14<br>(9.94)  | 33.81<br>(9.36) | 40.28<br>(9.73)  | 39.52<br>(10.22) | 39.93<br>(9.94)  |
| > 12 education years | 49.3<br>(10.43)  | 50.79<br>(10.7)  | 49.82<br>(10.54) | 48.47<br>(9.34)  | 46.21<br>(10.55) | 47.7<br>(9.81)   | 44.09<br>(9.47) | 45.51<br>(9.84) | 44.63<br>(9.62) | 43.33<br>(9.83) | 41.14<br>(13.83) | 42.58<br>(11.38) | 37.71<br>(8.98) | 36.02<br>(10.15) | 36.93<br>(9.55) | 45.25<br>(10.39) | 44.25<br>(12.16) | 44.88<br>(11.08) |
| total                | 48.75<br>(10.16) | 49.91<br>(10.52) | 49.19<br>(10.3)  | 47.44<br>(10.78) | 44.9<br>(10.31)  | 46.48<br>(10.66) | 43.78<br>(8.97) | 43.7<br>(9.77)  | 43.75<br>(9.28) | 42.33<br>(9.62) | 40.59<br>(13.26) | 41.73<br>(11.02) | 36.95<br>(9.03) | 35.28<br>(10.13) | 36.17<br>(9.58) | 44.34<br>(10.44) | 43.13<br>(11.89) | 43.88<br>(11.04) |

**Trail Making Test - Part A**

|                      |                 |                  |                  |                  |                 |                  |                  |                  |                 |                 |                  |                 |                  |                 |                  |                  |                  |                  |
|----------------------|-----------------|------------------|------------------|------------------|-----------------|------------------|------------------|------------------|-----------------|-----------------|------------------|-----------------|------------------|-----------------|------------------|------------------|------------------|------------------|
| ≤ 12 education years | 24.36<br>(8.91) | 21.52<br>(6.82)  | 23.03<br>(8.06)  | 23.81<br>(7.97)  | 24.76<br>(8.27) | 24.33<br>(8.06)  | 24.25<br>(8.17)  | 35.15<br>(41.67) | 28.92<br>(28.2) | 28.42<br>(9.98) | 37.87<br>(43.66) | 31.9<br>(27.8)  | 33.89<br>(10.74) | 32.0<br>(9.87)  | 32.98<br>(10.28) | 27.09<br>(9.88)  | 30.42<br>(28.74) | 28.58<br>(20.59) |
| > 12 education years | 22.29<br>(9.49) | 20.67<br>(14.63) | 21.71<br>(11.61) | 25.47<br>(27.37) | 22.31<br>(7.39) | 24.39<br>(22.62) | 24.18<br>(10.05) | 22.43<br>(6.46)  | 23.55<br>(8.94) | 26.2<br>(8.4)   | 26.11<br>(7.04)  | 26.17<br>(7.96) | 29.74<br>(9.77)  | 30.26<br>(8.71) | 29.97<br>(9.28)  | 25.08<br>(14.52) | 24.06<br>(10.15) | 24.7<br>(13.11)  |
| total                | 22.61<br>(9.41) | 20.86<br>(13.31) | 21.94<br>(11.07) | 25.25<br>(25.62) | 22.95<br>(7.66) | 24.38<br>(20.73) | 24.19<br>(9.71)  | 25.32<br>(21.05) | 24.62<br>(15.0) | 26.69<br>(8.8)  | 29.05<br>(22.98) | 27.5<br>(15.22) | 30.77<br>(10.13) | 30.73<br>(9.02) | 30.75<br>(9.61)  | 25.45<br>(13.8)  | 25.6<br>(16.88)  | 25.51<br>(15.04) |

**Trail Making Test - Part B**

|                      |                  |                  |                  |                  |                  |                  |                  |                  |                  |                  |                  |                  |                  |                  |                  |                  |                  |                  |
|----------------------|------------------|------------------|------------------|------------------|------------------|------------------|------------------|------------------|------------------|------------------|------------------|------------------|------------------|------------------|------------------|------------------|------------------|------------------|
| ≤ 12 education years | 47.94<br>(16.72) | 51.93<br>(18.57) | 49.81<br>(17.58) | 46.9<br>(16.58)  | 58.28<br>(29.19) | 53.09<br>(24.68) | 54.81<br>(23.36) | 68.78<br>(45.99) | 60.79<br>(35.26) | 57.7<br>(25.5)   | 63.84<br>(39.24) | 59.96<br>(31.19) | 73.0<br>(32.44)  | 72.46<br>(24.31) | 72.74<br>(28.55) | 56.39<br>(25.2)  | 62.92<br>(33.46) | 59.3<br>(29.31)  |
| > 12 education years | 42.48<br>(14.27) | 44.17<br>(22.41) | 43.08<br>(17.61) | 48.24<br>(29.52) | 44.5<br>(16.32)  | 46.94<br>(25.73) | 48.25<br>(17.14) | 45.07<br>(16.84) | 47.1<br>(17.07)  | 52.87<br>(22.16) | 57.38<br>(27.98) | 54.36<br>(24.29) | 67.4<br>(33.58)  | 69.78<br>(29.19) | 68.47<br>(31.61) | 50.15<br>(23.81) | 51.41<br>(24.9)  | 50.61<br>(24.21) |
| total                | 43.31<br>(14.75) | 45.87<br>(21.8)  | 44.28<br>(17.76) | 48.06<br>(28.09) | 48.05<br>(21.13) | 48.06<br>(25.6)  | 49.45<br>(18.54) | 50.49<br>(28.08) | 49.84<br>(22.55) | 53.93<br>(22.97) | 58.99<br>(31.13) | 55.66<br>(26.11) | 68.79<br>(33.25) | 70.52<br>(27.84) | 69.58<br>(30.83) | 51.3<br>(24.18)  | 54.22<br>(27.65) | 52.41<br>(25.58) |

**Letter Fluency Test Total (the sum of all three letters)**

|                      |                  |                  |                  |                  |                  |                  |                  |                  |                  |                  |                  |                  |                  |                  |                  |                  |                  |                  |
|----------------------|------------------|------------------|------------------|------------------|------------------|------------------|------------------|------------------|------------------|------------------|------------------|------------------|------------------|------------------|------------------|------------------|------------------|------------------|
| ≤ 12 education years | 39.72<br>(10.37) | 38.14<br>(12.62) | 38.98<br>(11.4)  | 38.7<br>(11.9)   | 34.96<br>(13.55) | 36.62<br>(12.84) | 37.8<br>(11.08)  | 37.57<br>(9.72)  | 37.7<br>(10.42)  | 40.31<br>(11.19) | 42.45<br>(13.43) | 41.06<br>(11.98) | 38.32<br>(12.34) | 39.46<br>(15.21) | 38.87<br>(13.67) | 39.16<br>(11.21) | 38.61<br>(13.03) | 38.91<br>(12.04) |
| > 12 education years | 43.69<br>(11.7)  | 45.05<br>(12.36) | 44.18<br>(11.94) | 44.69<br>(11.99) | 45.35<br>(9.71)  | 44.92<br>(11.22) | 44.73<br>(12.67) | 45.63<br>(9.78)  | 45.07<br>(11.67) | 46.39<br>(11.77) | 44.48<br>(13.75) | 45.76<br>(12.46) | 44.84<br>(11.31) | 43.3<br>(15.26)  | 44.16<br>(13.16) | 44.89<br>(11.94) | 44.83<br>(12.24) | 44.87<br>(12.05) |
| total                | 43.09<br>(11.57) | 43.57<br>(12.69) | 43.28<br>(12)    | 43.91<br>(12.11) | 42.67<br>(11.68) | 43.43<br>(11.94) | 43.47<br>(12.66) | 43.77<br>(10.31) | 43.58<br>(11.79) | 45<br>(11.89)    | 43.98<br>(13.65) | 44.66<br>(12.5)  | 43.24<br>(11.85) | 42.23<br>(15.26) | 42.78<br>(13.46) | 43.83<br>(12.01) | 43.32<br>(12.71) | 43.63<br>(12.28) |

**Letter Fluency 1. Letter**

|                      |                 |                 |                 |                 |                 |                 |                 |                 |                 |                 |                 |                 |                 |                 |                 |                 |                 |                 |
|----------------------|-----------------|-----------------|-----------------|-----------------|-----------------|-----------------|-----------------|-----------------|-----------------|-----------------|-----------------|-----------------|-----------------|-----------------|-----------------|-----------------|-----------------|-----------------|
| ≤ 12 education years | 12.94<br>(4.58) | 13.18<br>(3.98) | 13.05<br>(4.28) | 13.5<br>(4.75)  | 11.2<br>(5.19)  | 12.22<br>(5.08) | 12.97<br>(4.29) | 12.5<br>(4.1)   | 12.76<br>(4.18) | 14.0<br>(4.61)  | 14.79<br>(4.84) | 14.28<br>(4.68) | 13.07<br>(4.61) | 13.5<br>(5.43)  | 13.28<br>(4.98) | 13.37<br>(4.53) | 13.08<br>(4.8)  | 13.24<br>(4.64) |
| > 12 education years | 14.73<br>(4.56) | 14.93<br>(4.68) | 14.8<br>(4.6)   | 14.88<br>(4.66) | 15.68<br>(4.3)  | 15.16<br>(4.55) | 15.29<br>(4.91) | 15.48<br>(4.36) | 15.36<br>(4.71) | 15.55<br>(4.51) | 14.67<br>(5.32) | 15.26<br>(4.8)  | 15.38<br>(4.85) | 14.94<br>(6.22) | 15.19<br>(5.47) | 15.15<br>(4.68) | 15.12<br>(4.96) | 15.14<br>(4.78) |
| total                | 14.46<br>(4.6)  | 14.56<br>(4.58) | 14.5<br>(4.59)  | 14.7<br>(4.68)  | 14.53<br>(4.93) | 14.63<br>(4.77) | 14.86<br>(4.88) | 14.79<br>(4.47) | 14.84<br>(4.72) | 15.2<br>(4.57)  | 14.7<br>(5.19)  | 15.03<br>(4.78) | 14.82<br>(4.87) | 14.54<br>(6.01) | 14.69<br>(5.4)  | 14.82<br>(4.7)  | 14.63<br>(4.99) | 14.75<br>(4.81) |

**Letter Fluency 2. Letter**



Journal of Neurology | Supplementary Material

|                                 |                 |                 |                 |                 |                 |                 |                 |                 |                 |                 |                 |                 |                 |                 |                 |                 |                 |                 |
|---------------------------------|-----------------|-----------------|-----------------|-----------------|-----------------|-----------------|-----------------|-----------------|-----------------|-----------------|-----------------|-----------------|-----------------|-----------------|-----------------|-----------------|-----------------|-----------------|
| ≤ 12 education years            | 11.59<br>(3.26) | 10.46<br>(4.81) | 11.07<br>(4.06) | 11.05<br>(4.52) | 10.08<br>(4.79) | 10.51<br>(4.64) | 10.46<br>(3.28) | 10.96<br>(3.66) | 10.68<br>(3.44) | 11.43<br>(4.12) | 11.31<br>(4.46) | 11.39<br>(4.22) | 11.25<br>(5.06) | 10.92<br>(6.27) | 11.09<br>(5.62) | 11.18<br>(4.01) | 10.76<br>(4.79) | 11<br>(4.38)    |
| > 12 education years            | 12.44<br>(4.16) | 13.13<br>(4.4)  | 12.69<br>(4.25) | 12.61<br>(4.54) | 13<br>(4.43)    | 12.75<br>(4.5)  | 13.11<br>(4.53) | 13.48<br>(3.57) | 13.25<br>(4.2)  | 14.08<br>(4.38) | 13.18<br>(4.6)  | 13.78<br>(4.46) | 13.23<br>(4.03) | 13.31<br>(5.1)  | 13.27<br>(4.51) | 13.11<br>(4.38) | 13.22<br>(4.38) | 13.15<br>(4.38) |
| total                           | 12.31<br>(4.04) | 12.56<br>(4.6)  | 12.41<br>(4.26) | 12.41<br>(4.56) | 12.25<br>(4.68) | 12.34<br>(4.59) | 12.63<br>(4.45) | 12.9<br>(3.73)  | 12.73<br>(4.18) | 13.48<br>(4.45) | 12.72<br>(4.62) | 13.22<br>(4.52) | 12.75<br>(4.37) | 12.65<br>(5.52) | 12.7<br>(4.91)  | 12.75<br>(4.38) | 12.63<br>(4.6)  | 12.71<br>(4.47) |
| <b>Letter Fluency 3. Letter</b> |                 |                 |                 |                 |                 |                 |                 |                 |                 |                 |                 |                 |                 |                 |                 |                 |                 |                 |
| ≤ 12 education years            | 15.19<br>(4.75) | 14.5<br>(5.09)  | 14.87<br>(4.88) | 14.15<br>(4.92) | 13.68<br>(5.38) | 13.89<br>(5.13) | 14.37<br>(5.19) | 14.11<br>(3.86) | 14.25<br>(4.61) | 14.89<br>(4.36) | 16.34<br>(5.47) | 15.4<br>(4.8)   | 14.0<br>(4.88)  | 15.04<br>(5.96) | 14.5<br>(5.4)   | 14.6<br>(4.73)  | 14.76<br>(5.19) | 14.68<br>(4.93) |
| > 12 education years            | 16.52<br>(4.74) | 16.99<br>(5.1)  | 16.69<br>(4.87) | 17.13<br>(4.71) | 16.67<br>(3.6)  | 16.97<br>(4.35) | 16.33<br>(4.79) | 16.67<br>(4.15) | 16.46<br>(4.56) | 16.75<br>(4.78) | 16.63<br>(5.25) | 16.71<br>(4.93) | 16.22<br>(4.18) | 15.04<br>(5.59) | 15.71<br>(4.87) | 16.61<br>(4.69) | 16.48<br>(4.82) | 16.57<br>(4.74) |
| total                           | 16.32<br>(4.75) | 16.46<br>(5.18) | 16.37<br>(4.91) | 16.75<br>(4.82) | 15.9<br>(4.3)   | 16.42<br>(4.64) | 15.97<br>(4.91) | 16.07<br>(4.21) | 16.01<br>(4.64) | 16.33<br>(4.75) | 16.56<br>(5.29) | 16.41<br>(4.93) | 15.68<br>(4.45) | 15.04<br>(5.66) | 15.39<br>(5.03) | 16.24<br>(4.76) | 16.07<br>(4.96) | 16.17<br>(4.84) |

Note. Symbol Digit Modalities Test (min.-max.: 0–110 points in 90 sec); Category fluency (number of correct words - animals in 60 sec); Stroop in each test (min.-max.: 0–200 in 45 sec); Trail Making Test, Part A and Part B (both time in sec, max. 240 sec, the longer time elapsed, the worse performance); Letter fluency (number of correct words for three letters in 60 sec each, i.e. in total 180 sec).

**Supplementary Material Table 6**

Means and standard deviations for each cognitive test for the German sample stratified by age, education, and gender

|                                           | Age Group         |                   |                   |                   |                   |                   |                   |                  |                   |                  |                  |                  |                  |                  |                  |                   |                  |                   |
|-------------------------------------------|-------------------|-------------------|-------------------|-------------------|-------------------|-------------------|-------------------|------------------|-------------------|------------------|------------------|------------------|------------------|------------------|------------------|-------------------|------------------|-------------------|
|                                           | 18-34 years       |                   |                   | 35-44 years       |                   |                   | 45-54 years       |                  |                   | 55-64 years      |                  |                  | > 64 years       |                  |                  | Total             |                  |                   |
|                                           | female            | male              | all               | female            | male              | all               | female            | male             | all               | female           | male             | all              | female           | male             | all              | female            | male             | all               |
| <b>Symbol Digit Modalities Test</b>       |                   |                   |                   |                   |                   |                   |                   |                  |                   |                  |                  |                  |                  |                  |                  |                   |                  |                   |
| ≤ 12 education years                      | 50.67<br>(11.25)  | 55.0<br>(7.69)    | 52.17<br>(10.19)  | 52.64<br>(7.85)   | 47.11<br>(8.08)   | 50.48<br>(8.23)   | 47.4<br>(8.49)    | 43.4<br>(11.18)  | 45.4<br>(9.96)    | 44.03<br>(8.85)  | 35.53<br>(7.94)  | 41.43<br>(9.37)  | 34.52<br>(9.52)  | 33.67<br>(8.17)  | 34.13<br>(8.81)  | 44.75<br>(10.92)  | 40.83<br>(11.25) | 43.2<br>(11.19)   |
| > 12 education years                      | 58.16<br>(10.07)  | 54.57<br>(9.6)    | 56.77<br>(10)     | 56.45<br>(9.52)   | 53.02<br>(7.1)    | 54.79<br>(8.56)   | 50.96<br>(9.48)   | 46.47<br>(10.01) | 49.28<br>(9.89)   | 49.2<br>(10.19)  | 43.82<br>(8.77)  | 46.38<br>(9.8)   | 38.43<br>(8.05)  | 39.6<br>(10.91)  | 39.12<br>(9.71)  | 53.07<br>(10.84)  | 48.51<br>(10.43) | 51.05<br>(10.88)  |
| total                                     | 56.9<br>(10.59)   | 54.64<br>(9.28)   | 56.03<br>(10.14)  | 55.6<br>(9.25)    | 52.05<br>(7.52)   | 53.95<br>(8.64)   | 50.43<br>(9.38)   | 45.77<br>(10.28) | 48.58<br>(9.98)   | 46.85<br>(9.89)  | 41.75<br>(9.24)  | 44.59<br>(9.9)   | 36.09<br>(9.04)  | 36.79<br>(10.04) | 36.45<br>(9.51)  | 50.79<br>(11.46)  | 46.69<br>(11.1)  | 49.02<br>(11.48)  |
| <b>Categorical Fluency Test (Animals)</b> |                   |                   |                   |                   |                   |                   |                   |                  |                   |                  |                  |                  |                  |                  |                  |                   |                  |                   |
| ≤ 12 education years                      | 21.64<br>(3.93)   | 22.62<br>(2.26)   | 22.0<br>(3.39)    | 23.0<br>(3.44)    | 18.56<br>(5.03)   | 21.26<br>(4.59)   | 21.4<br>(5.84)    | 20.53<br>(4.94)  | 20.97<br>(5.33)   | 21.91<br>(6.09)  | 23.07<br>(5.55)  | 22.27<br>(5.89)  | 18.76<br>(5.16)  | 21.28<br>(4.7)   | 19.92<br>(5.05)  | 21.28<br>(5.35)   | 21.31<br>(4.88)  | 21.29<br>(5.15)   |
| > 12 education years                      | 24.03<br>(4.6)    | 22.21<br>(5.55)   | 23.32<br>(5.05)   | 23.67<br>(4.63)   | 22.65<br>(5.79)   | 23.18<br>(5.22)   | 25.16<br>(5.88)   | 23.08<br>(5.49)  | 24.39<br>(5.81)   | 25.78<br>(6.31)  | 22.31<br>(5.77)  | 23.97<br>(6.24)  | 20.21<br>(5.69)  | 20.45<br>(4.76)  | 20.35<br>(5.08)  | 24.4<br>(5.49)    | 22.37<br>(5.56)  | 23.51<br>(5.61)   |
| total                                     | 23.65<br>(4.56)   | 22.27<br>(5.19)   | 23.12<br>(4.84)   | 23.52<br>(4.38)   | 21.98<br>(5.84)   | 22.81<br>(5.15)   | 24.60<br>(6.00)   | 22.50<br>(5.44)  | 23.77<br>(5.86)   | 24.03<br>(6.46)  | 22.50<br>(5.68)  | 23.35<br>(6.15)  | 19.34<br>(5.34)  | 20.84<br>(4.69)  | 20.12<br>(5.03)  | 23.56<br>(5.62)   | 22.12<br>(5.42)  | 22.94<br>(5.58)   |
| <b>Stroop Color Naming Test</b>           |                   |                   |                   |                   |                   |                   |                   |                  |                   |                  |                  |                  |                  |                  |                  |                   |                  |                   |
| ≤ 12 education years                      | 74.07<br>(8.8)    | 74.62<br>(11.21)  | 74.26<br>(9.45)   | 72.57<br>(14.85)  | 70.67<br>(15.17)  | 71.83<br>(14.66)  | 71.07<br>(9.59)   | 68.6<br>(10.83)  | 69.83<br>(10.13)  | 70.06<br>(10.56) | 64.2<br>(12.68)  | 68.27<br>(11.45) | 62.71<br>(10.82) | 64.17<br>(10.73) | 63.38<br>(10.66) | 69.62<br>(11.39)  | 67.38<br>(12.15) | 68.73<br>(11.71)  |
| > 12 education years                      | 78.66<br>(12.68)  | 77.57<br>(11.0)   | 78.24<br>(12.03)  | 77.82<br>(13.25)  | 74.57<br>(11.12)  | 76.24<br>(12.31)  | 76.0<br>(11.16)   | 74.3<br>(14.59)  | 75.38<br>(12.5)   | 75.46<br>(11.51) | 69.36<br>(13.04) | 72.27<br>(12.64) | 66.5<br>(13.46)  | 65.45<br>(13.64) | 65.88<br>(13.37) | 76.5<br>(12.38)   | 73.15<br>(13.1)  | 75.03<br>(12.8)   |
| total                                     | 77.89<br>(12.2)   | 77.13<br>(10.98)  | 77.6<br>(11.72)   | 76.65<br>(13.68)  | 73.93<br>(11.8)   | 75.38<br>(12.85)  | 75.27<br>(11.04)  | 72.98<br>(13.95) | 74.37<br>(12.27)  | 73.01<br>(11.35) | 68.07<br>(13.04) | 70.81<br>(12.33) | 64.23<br>(11.9)  | 64.84<br>(12.2)  | 64.55<br>(11.98) | 74.62<br>(12.49)  | 71.78<br>(13.09) | 73.4<br>(12.82)   |
| <b>Stroop Word Reading Test</b>           |                   |                   |                   |                   |                   |                   |                   |                  |                   |                  |                  |                  |                  |                  |                  |                   |                  |                   |
| ≤ 12 education years                      | 99.6<br>(12.19)   | 102.38<br>(15.55) | 100.57<br>(13.16) | 92.79<br>(15.17)  | 93.44<br>(16.69)  | 93.04<br>(15.41)  | 96.47<br>(12.36)  | 93.67<br>(12.83) | 95.07<br>(12.46)  | 92.53<br>(20.22) | 86.53<br>(11.08) | 90.69<br>(18.02) | 83.43<br>(15.03) | 87.44<br>(10.37) | 85.28<br>(13.08) | 92.3<br>(16.88)   | 91.34<br>(13.4)  | 91.92<br>(15.56)  |
| > 12 education years                      | 100.47<br>(17.89) | 103.55<br>(16.56) | 101.67<br>(17.38) | 105.96<br>(14.26) | 101.87<br>(14.63) | 103.98<br>(14.51) | 100.72<br>(15.15) | 99.24<br>(16.83) | 100.17<br>(15.75) | 99.56<br>(14.83) | 94.44<br>(19.82) | 96.88<br>(17.7)  | 90.64<br>(14.15) | 90.7<br>(19.36)  | 90.68<br>(17.16) | 100.91<br>(15.94) | 98.94<br>(17.61) | 100.04<br>(16.71) |

|                                                                 |                  |                   |                   |                   |                   |                   |                   |                  |                  |                  |                  |                  |                   |                   |                   |                  |                  |                  |  |
|-----------------------------------------------------------------|------------------|-------------------|-------------------|-------------------|-------------------|-------------------|-------------------|------------------|------------------|------------------|------------------|------------------|-------------------|-------------------|-------------------|------------------|------------------|------------------|--|
| total                                                           | 100.33<br>(17.0) | 103.38<br>(16.29) | 101.49<br>(16.74) | 103.03<br>(15.37) | 100.49<br>(15.15) | 101.85<br>(15.26) | 100.09<br>(14.79) | 97.97<br>(16.09) | 99.25<br>(15.31) | 96.37<br>(17.71) | 92.47<br>(18.27) | 94.64<br>(18.0)  | 86.31<br>(14.91)  | 89.16<br>(15.64)  | 87.79<br>(15.25)  | 98.56<br>(16.63) | 97.14<br>(16.99) | 97.95<br>(16.79) |  |
| <b>Stroop Interference Test</b>                                 |                  |                   |                   |                   |                   |                   |                   |                  |                  |                  |                  |                  |                   |                   |                   |                  |                  |                  |  |
| ≤ 12 education years                                            | 44.93<br>(8.71)  | 50.5<br>(6.8)     | 46.87<br>(8.38)   | 44.86<br>(7.8)    | 38.44<br>(10.51)  | 42.35<br>(9.3)    | 38.13<br>(6.59)   | 36.47<br>(6.65)  | 37.3<br>(6.56)   | 36.28<br>(9.22)  | 34.73<br>(8.51)  | 35.79<br>(8.94)  | 33.19<br>(17.33)  | 26.72<br>(8.78)   | 30.21<br>(14.25)  | 38.47<br>(11.65) | 35.37<br>(10.78) | 37.23<br>(11.38) |  |
| > 12 education years                                            | 46.91<br>(9.79)  | 49.57<br>(12.5)   | 47.92<br>(10.93)  | 43.88<br>(7.94)   | 43.91<br>(10.23)  | 43.89<br>(9.07)   | 43.78<br>(10.56)  | 41.78<br>(9.53)  | 43.04<br>(10.2)  | 40.12<br>(10.3)  | 39.09<br>(9.66)  | 39.58<br>(9.93)  | 32.36<br>(9.41)   | 33.6<br>(10.69)   | 33.09<br>(10.06)  | 43.5<br>(10.31)  | 42.61<br>(11.45) | 43.11<br>(10.82) |  |
| total                                                           | 46.57<br>(9.59)  | 49.7<br>(11.79)   | 47.76<br>(10.55)  | 44.1<br>(7.85)    | 43.02<br>(10.38)  | 43.59<br>(9.1)    | 42.94<br>(10.24)  | 40.55<br>(9.18)  | 42.01<br>(9.88)  | 38.44<br>(9.96)  | 38.0<br>(9.51)   | 38.24<br>(9.73)  | 32.86<br>(14.51)  | 30.34<br>(10.31)  | 31.55<br>(12.48)  | 42.15<br>(10.9)  | 40.88<br>(11.69) | 41.6<br>(11.26)  |  |
| <b>Trail Making Test - Part-A</b>                               |                  |                   |                   |                   |                   |                   |                   |                  |                  |                  |                  |                  |                   |                   |                   |                  |                  |                  |  |
| ≤ 12 education years                                            | 24.38<br>(3.8)   | 28.29<br>(6.6)    | 25.75<br>(5.15)   | 23.83<br>(5.95)   | 26.22<br>(17.1)   | 24.86<br>(11.74)  | 28.45<br>(8.44)   | 27.93<br>(9.59)  | 28.15<br>(8.95)  | 29.86<br>(9.14)  | 34.79<br>(11.01) | 31.5<br>(9.95)   | 40.05<br>(13.23)  | 36.41<br>(8.93)   | 38.33<br>(11.4)   | 30.28<br>(10.76) | 31.6<br>(11.32)  | 30.84<br>(10.98) |  |
| > 12 education years                                            | 21.87<br>(6.68)  | 20.51<br>(8.65)   | 21.34<br>(7.5)    | 21.23<br>(6.51)   | 23.03<br>(6.29)   | 22.12<br>(6.42)   | 25.06<br>(7.15)   | 27.32<br>(17.03) | 25.93<br>(11.93) | 28.61<br>(10.7)  | 28.71<br>(9.58)  | 28.66<br>(10.04) | 35.07<br>(10.96)  | 45.0<br>(30.55)   | 40.21<br>(23.41)  | 24.57<br>(8.61)  | 26.53<br>(15.15) | 25.44<br>(12)    |  |
| total                                                           | 22.27<br>(6.35)  | 21.6<br>(8.77)    | 22.02<br>(7.35)   | 21.84<br>(6.42)   | 23.64<br>(9.18)   | 22.7<br>(7.88)    | 25.56<br>(7.39)   | 27.49<br>(15.28) | 26.38<br>(11.4)  | 29.18<br>(9.95)  | 30.35<br>(10.24) | 29.72<br>(10.06) | 37.94<br>(12.39)  | 40.44<br>(21.94)  | 39.17<br>(17.65)  | 26.15<br>(9.58)  | 27.86<br>(14.4)  | 26.9<br>(11.96)  |  |
| <b>Trail Making Test - Part-B</b>                               |                  |                   |                   |                   |                   |                   |                   |                  |                  |                  |                  |                  |                   |                   |                   |                  |                  |                  |  |
| ≤ 12 education years                                            | 42.92<br>(9.16)  | 47.14<br>(11.71)  | 44.4<br>(10.03)   | 45.83<br>(12.04)  | 61.0<br>(22.59)   | 52.33<br>(18.52)  | 70.18<br>(28.91)  | 61.73<br>(21.37) | 65.31<br>(24.66) | 60.32<br>(15.78) | 87.86<br>(49.56) | 69.5<br>(33.4)   | 113.26<br>(62.92) | 101.94<br>(58.56) | 107.92<br>(60.31) | 68.93<br>(41.84) | 76.9<br>(44.79)  | 72.34<br>(43.16) |  |
| > 12 education years                                            | 43.49<br>(17.96) | 42.81<br>(18.88)  | 43.23<br>(18.24)  | 42.9<br>(14.71)   | 55.03<br>(21.16)  | 48.88<br>(19.07)  | 49.59<br>(14.43)  | 52.8<br>(18.14)  | 50.83<br>(15.95) | 56.15<br>(17.93) | 59.84<br>(32.68) | 58.13<br>(26.74) | 83.79<br>(29.19)  | 88.07<br>(65.98)  | 86.0<br>(50.76)   | 49.71<br>(19.96) | 55.4<br>(31.23)  | 52.24<br>(25.71) |  |
| total                                                           | 43.4<br>(16.8)   | 43.42<br>(18.02)  | 43.41<br>(17.21)  | 43.59<br>(14.07)  | 56.17<br>(21.32)  | 49.62<br>(18.91)  | 52.61<br>(18.55)  | 55.24<br>(19.29) | 53.72<br>(18.84) | 58.07<br>(16.97) | 67.38<br>(39.48) | 62.35<br>(29.76) | 100.76<br>(52.84) | 95.44<br>(61.52)  | 98.14<br>(56.89)  | 55.03<br>(29.02) | 61.05<br>(36.45) | 57.68<br>(32.61) |  |
| <b>Letter Fluency Test Total (the sum of all three letters)</b> |                  |                   |                   |                   |                   |                   |                   |                  |                  |                  |                  |                  |                   |                   |                   |                  |                  |                  |  |
| ≤ 12 education years                                            | 39.0<br>(9.03)   | 33.86<br>(12.56)  | 37.2<br>(10.38)   | 36.55<br>(7.39)   | 35.22<br>(13.05)  | 35.95<br>(10.04)  | 36.33<br>(10.79)  | 30.6<br>(9.97)   | 33.15<br>(10.55) | 36.11<br>(6.95)  | 33.07<br>(15.25) | 35.1<br>(10.38)  | 29.32<br>(7.33)   | 31.65<br>(7.45)   | 30.42<br>(7.37)   | 35.1<br>(8.54)   | 32.48<br>(11.28) | 33.98<br>(9.85)  |  |
| > 12 education years                                            | 41.81<br>(11.06) | 40.6<br>(9.59)    | 41.34<br>(10.49)  | 40.03<br>(13.23)  | 39.43<br>(8.65)   | 39.73<br>(11.14)  | 40.1<br>(12.4)    | 36.83<br>(11.35) | 38.79<br>(12.04) | 43.24<br>(12.53) | 37.97<br>(10.49) | 40.46<br>(11.71) | 41.46<br>(17.08)  | 32.5<br>(12.32)   | 36.81<br>(15.21)  | 41.19<br>(12.42) | 38.22<br>(10.4)  | 39.87<br>(11.65) |  |
| total                                                           | 41.36<br>(10.76) | 39.66<br>(10.19)  | 40.71<br>(10.54)  | 39.24<br>(12.19)  | 38.61<br>(9.64)   | 38.94<br>(10.97)  | 39.49<br>(12.17)  | 35.19<br>(11.26) | 37.64<br>(11.93) | 39.97<br>(10.88) | 36.63<br>(12.02) | 38.45<br>(11.48) | 34.25<br>(13.45)  | 32.03<br>(9.78)   | 33.16<br>(11.74)  | 39.49<br>(11.78) | 36.71<br>(10.92) | 38.26<br>(11.48) |  |
| <b>Letter Fluency Test - 1. Letter</b>                          |                  |                   |                   |                   |                   |                   |                   |                  |                  |                  |                  |                  |                   |                   |                   |                  |                  |                  |  |
| ≤ 12 education years                                            | 14.38<br>(4.25)  | 11.0<br>(4.47)    | 13.2<br>(4.53)    | 14.73<br>(4.03)   | 12.11<br>(3.48)   | 13.55<br>(3.93)   | 13.67<br>(3.39)   | 10.93<br>(3.53)  | 12.15<br>(3.68)  | 12.39<br>(3.44)  | 10.86<br>(6.69)  | 11.88<br>(4.74)  | 10.32<br>(3.35)   | 10.76<br>(3.44)   | 10.53<br>(3.35)   | 12.72<br>(3.87)  | 11.05<br>(4.39)  | 12.01<br>(4.17)  |  |
| > 12 education years                                            | 15.28<br>(4.82)  | 15.84<br>(4.4)    | 15.5<br>(4.65)    | 15.0<br>(4.88)    | 14.34<br>(3.96)   | 14.67<br>(4.43)   | 14.0<br>(4.56)    | 13.14<br>(4.75)  | 13.66<br>(4.63)  | 15.03<br>(5.55)  | 13.35<br>(4.49)  | 14.14<br>(5.05)  | 15.15<br>(6.82)   | 10.93<br>(5.48)   | 12.96<br>(6.41)   | 14.81<br>(4.99)  | 13.94<br>(4.66)  | 14.42<br>(4.86)  |  |

|                                        |                 |                 |                 |                 |                 |                 |                 |                 |                 |                 |                 |                 |                 |                 |                 |                 |                 |                 |
|----------------------------------------|-----------------|-----------------|-----------------|-----------------|-----------------|-----------------|-----------------|-----------------|-----------------|-----------------|-----------------|-----------------|-----------------|-----------------|-----------------|-----------------|-----------------|-----------------|
| total                                  | 15.14<br>(4.72) | 15.16<br>(4.68) | 15.15<br>(4.68) | 14.94<br>(4.67) | 13.91<br>(3.94) | 14.44<br>(4.33) | 13.95<br>(4.37) | 12.56<br>(4.54) | 13.35<br>(4.48) | 13.82<br>(4.85) | 12.67<br>(5.23) | 13.29<br>(5.04) | 12.28<br>(5.51) | 10.84<br>(4.4)  | 11.57<br>(5.01) | 14.23<br>(4.79) | 13.18<br>(4.76) | 13.76<br>(4.8)  |
| <b>Letter Fluency Test - 2. Letter</b> |                 |                 |                 |                 |                 |                 |                 |                 |                 |                 |                 |                 |                 |                 |                 |                 |                 |                 |
| ≤ 12 education years                   | 12.08<br>(3.55) | 10.71<br>(3.59) | 11.6<br>(3.53)  | 10.36<br>(2.8)  | 10.67<br>(5.07) | 10.5<br>(3.87)  | 11.5<br>(5.49)  | 9.53<br>(3.96)  | 10.41<br>(4.71) | 10.64<br>(2.57) | 11.57<br>(5.37) | 10.95<br>(3.7)  | 9.53<br>(3.03)  | 10.12<br>(2.71) | 9.81<br>(2.86)  | 10.7<br>(3.43)  | 10.45<br>(4.11) | 10.59<br>(3.72) |
| > 12 education years                   | 12.62<br>(3.51) | 11.65<br>(3.41) | 12.24<br>(3.49) | 12.13<br>(5.18) | 11.95<br>(3.56) | 12.04<br>(4.42) | 12.57<br>(4.42) | 11.98<br>(4.39) | 12.33<br>(4.39) | 13.82<br>(4.8)  | 12.03<br>(3.96) | 12.87<br>(4.44) | 13.0<br>(4.71)  | 11.21<br>(4.34) | 12.07<br>(4.52) | 12.73<br>(4.37) | 11.84<br>(3.85) | 12.33<br>(4.16) |
| total                                  | 12.53<br>(3.5)  | 11.52<br>(3.41) | 12.15<br>(3.49) | 11.73<br>(4.78) | 11.7<br>(3.87)  | 11.72<br>(4.34) | 12.4<br>(4.58)  | 11.33<br>(4.38) | 11.94<br>(4.51) | 12.36<br>(4.22) | 11.9<br>(4.34)  | 12.15<br>(4.26) | 10.94<br>(4.11) | 10.61<br>(3.52) | 10.78<br>(3.8)  | 12.16<br>(4.22) | 11.47<br>(3.96) | 11.86<br>(4.12) |
| <b>Letter Fluency Test - 3. Letter</b> |                 |                 |                 |                 |                 |                 |                 |                 |                 |                 |                 |                 |                 |                 |                 |                 |                 |                 |
| ≤ 12 education years                   | 12.54<br>(4.1)  | 12.14<br>(5.67) | 12.4<br>(4.56)  | 11.45<br>(2.54) | 12.44<br>(5.05) | 11.9<br>(3.8)   | 11.17<br>(3.33) | 10.13<br>(4.05) | 10.59<br>(3.71) | 13.07<br>(3.39) | 10.64<br>(5.11) | 12.26<br>(4.14) | 9.47<br>(2.91)  | 10.76<br>(2.93) | 10.08<br>(2.95) | 11.67<br>(3.51) | 10.98<br>(4.33) | 11.38<br>(3.88) |
| > 12 education years                   | 13.91<br>(4.2)  | 13.12<br>(3.11) | 13.6<br>(3.82)  | 12.89<br>(4.69) | 12.92<br>(3.14) | 12.91<br>(3.97) | 13.52<br>(5.0)  | 11.71<br>(3.74) | 12.8<br>(4.6)   | 14.39<br>(3.95) | 12.59<br>(3.69) | 13.44<br>(3.9)  | 13.31<br>(6.26) | 10.36<br>(3.99) | 11.78<br>(5.32) | 13.66<br>(4.62) | 12.4<br>(3.53)  | 13.1<br>(4.21)  |
| total                                  | 13.69<br>(4.19) | 12.98<br>(3.51) | 13.42<br>(3.94) | 12.57<br>(4.32) | 12.83<br>(3.53) | 12.69<br>(3.94) | 13.15<br>(4.83) | 11.3<br>(3.85)  | 12.35<br>(4.51) | 13.79<br>(3.73) | 12.06<br>(4.17) | 13.0<br>(4.01)  | 11.03<br>(4.88) | 10.58<br>(3.39) | 10.81<br>(4.18) | 13.1<br>(4.42)  | 12.03<br>(3.8)  | 12.63<br>(4.19) |

Note: Symbol Digit Modalities Test (min.-max.: 0–110 points in 90 sec); Category fluency (number of correct words - animals in 60 sec); Stroop in each test (min.-max.: 0–200 in 45 sec); Trail Making Test, Part A and Part B (both time in sec, max. 240 sec, the longer time elapsed, the worse performance); Letter fluency test (number of correct words for three letters in 60 sec each, i.e. in total 180 sec).

**Supplementary Material Table 7**

Means and standard deviations for each cognitive test for the Spanish sample stratified by age, education, and gender.

|                                           | Age Group         |                   |                   |                   |                   |                   |                  |                   |                   |                  |                   |                  |                  |                  |                  |                  |                   |                  |
|-------------------------------------------|-------------------|-------------------|-------------------|-------------------|-------------------|-------------------|------------------|-------------------|-------------------|------------------|-------------------|------------------|------------------|------------------|------------------|------------------|-------------------|------------------|
|                                           | 18-34 years       |                   |                   | 35-44 years       |                   |                   | 45-54 years      |                   |                   | 55-64 years      |                   |                  | > 64 years       |                  |                  | Total            |                   |                  |
|                                           | female            | male              | all               | female            | male              | all               | female           | male              | all               | female           | male              | all              | female           | male             | all              | female           | male              | all              |
| <b>Symbol Digit Modalities Test</b>       |                   |                   |                   |                   |                   |                   |                  |                   |                   |                  |                   |                  |                  |                  |                  |                  |                   |                  |
| ≤ 12 education years                      | 50.38<br>(13.59)  | 53.54<br>(7.26)   | 51.96<br>(10.79)  | 50.9<br>(14.79)   | 47.84<br>(11.04)  | 48.9<br>(12.28)   | 45.96<br>(12.32) | 43.67<br>(9.06)   | 45.33<br>(11.43)  | 38.46<br>(12.15) | 45.0<br>(10.05)   | 39.77<br>(11.92) | 26.35<br>(10.88) | 27.88<br>(9.6)   | 26.84<br>(10.31) | 41.22<br>(14.86) | 45.29<br>(12.21)  | 42.76<br>(14.01) |
| > 12 education years                      | 61.65<br>(9.26)   | 57.14<br>(11.43)  | 60.08<br>(10.16)  | 54.0<br>(9.28)    | 55.53<br>(9.91)   | 54.53<br>(9.41)   | 55.96<br>(14.43) | 51.0<br>(7.83)    | 54.66<br>(13.1)   | 42.42<br>(15.37) | 50.2<br>(3.77)    | 44.71<br>(13.39) | 38.0<br>(8.05)   | 32.67<br>(15.53) | 36.22<br>(10.39) | 54.19<br>(13.4)  | 53.02<br>(11.25)  | 53.82<br>(12.73) |
| total                                     | 57.9<br>(11.98)   | 55.41<br>(9.65)   | 56.88<br>(11.08)  | 53.18<br>(10.86)  | 51.24<br>(11.1)   | 52.26<br>(10.94)  | 51.35<br>(14.28) | 47.53<br>(9.01)   | 50.32<br>(13.13)  | 39.65<br>(13.12) | 47.17<br>(8.21)   | 41.38<br>(12.51) | 29.39<br>(11.32) | 29.18<br>(10.85) | 29.32<br>(11.01) | 47.97<br>(15.51) | 48.82<br>(12.35)  | 48.27<br>(14.47) |
| <b>Categorical Fluency Test (Animals)</b> |                   |                   |                   |                   |                   |                   |                  |                   |                   |                  |                   |                  |                  |                  |                  |                  |                   |                  |
| ≤ 12 education years                      | 18.54<br>(6.95)   | 18.62<br>(5.85)   | 18.58<br>(6.29)   | 22.0<br>(5.16)    | 20.26<br>(5.55)   | 20.86<br>(5.39)   | 20.79<br>(4.13)  | 23.6<br>(8.96)    | 21.62<br>(5.95)   | 20.14<br>(5.48)  | 20.71<br>(3.64)   | 20.26<br>(5.12)  | 17.24<br>(4.89)  | 15.88<br>(3.6)   | 16.8<br>(4.49)   | 19.75<br>(5.36)  | 19.91<br>(6.2)    | 19.81<br>(5.67)  |
| > 12 education years                      | 22.96<br>(5.09)   | 23.21<br>(5.21)   | 23.05<br>(5.06)   | 25.07<br>(5.49)   | 23.53<br>(5.71)   | 24.52<br>(5.55)   | 23.18<br>(4.85)  | 25.2<br>(7.22)    | 23.71<br>(5.54)   | 21.82<br>(4.21)  | 21.0<br>(7.55)    | 21.56<br>(5.21)  | 20.5<br>(5.24)   | 19.0<br>(7.94)   | 20.0<br>(5.79)   | 23.33<br>(5.12)  | 23.23<br>(6.17)   | 23.3<br>(5.46)   |
| total                                     | 21.49<br>(6.06)   | 21.0<br>(5.9)     | 21.29<br>(5.96)   | 24.24<br>(5.51)   | 21.71<br>(5.77)   | 23.03<br>(5.74)   | 22.08<br>(4.64)  | 24.4<br>(7.96)    | 22.72<br>(5.79)   | 20.62<br>(5.15)  | 20.83<br>(5.29)   | 20.67<br>(5.13)  | 18.09<br>(5.08)  | 16.73<br>(4.88)  | 17.65<br>(4.98)  | 21.59<br>(5.52)  | 21.41<br>(6.38)   | 21.53<br>(5.83)  |
| <b>Stroop Color Naming Test</b>           |                   |                   |                   |                   |                   |                   |                  |                   |                   |                  |                   |                  |                  |                  |                  |                  |                   |                  |
| ≤ 12 education years                      | 77.85<br>(13.82)  | 77.54<br>(10.79)  | 77.69<br>(12.15)  | 73.5<br>(17.67)   | 73.58<br>(13.5)   | 73.55<br>(14.75)  | 73.12<br>(12.54) | 73.7<br>(11.24)   | 73.29<br>(12)     | 67.82<br>(11.3)  | 71.86<br>(12.29)  | 68.63<br>(11.44) | 54.53<br>(12.7)  | 60.62<br>(16.52) | 56.48<br>(13.98) | 68.78<br>(14.81) | 72.47<br>(13.45)  | 70.19<br>(14.37) |
| > 12 education years                      | 82.62<br>(9.03)   | 80.57<br>(12.03)  | 81.9<br>(10.08)   | 76.11<br>(12.08)  | 80.67<br>(11.09)  | 77.7<br>(11.82)   | 77.24<br>(13.96) | 73.8<br>(18.29)   | 76.36<br>(15.01)  | 72.45<br>(12.79) | 71.6<br>(9.37)    | 72.19<br>(11.51) | 65.5<br>(7.34)   | 41.0<br>(7.07)   | 59.38<br>(13.2)  | 77.09<br>(12.4)  | 76.43<br>(15.07)  | 76.88<br>(13.25) |
| total                                     | 81.03<br>(10.92)  | 79.11<br>(11.34)  | 80.24<br>(11.04)  | 75.42<br>(13.56)  | 76.71<br>(12.82)  | 76.03<br>(13.14)  | 75.38<br>(13.37) | 73.75<br>(14.77)  | 74.93<br>(13.68)  | 69.13<br>(11.76) | 71.75<br>(10.7)   | 69.75<br>(11.47) | 57.39<br>(12.4)  | 56.7<br>(16.92)  | 57.18<br>(13.65) | 73.11<br>(14.2)  | 74.24<br>(14.26)  | 73.51<br>(14.2)  |
| <b>Stroop Word Reading Test</b>           |                   |                   |                   |                   |                   |                   |                  |                   |                   |                  |                   |                  |                  |                  |                  |                  |                   |                  |
| ≤ 12 education years                      | 103.69<br>(10.37) | 104.08<br>(15.97) | 103.88<br>(13.19) | 101.2<br>(16.92)  | 100.37<br>(14.67) | 100.66<br>(15.18) | 96.04<br>(15.85) | 101.5<br>(17.79)  | 97.65<br>(16.36)  | 90.46<br>(17.13) | 100.71<br>(11.56) | 92.51<br>(16.55) | 74.24<br>(19.8)  | 74.75<br>(16.85) | 74.4<br>(18.55)  | 91.96<br>(18.83) | 97.86<br>(17.76)  | 94.21<br>(18.59) |
| > 12 education years                      | 111.46<br>(12.59) | 111.79<br>(15.65) | 111.58<br>(13.54) | 106.96<br>(13.07) | 113.27<br>(15.8)  | 109.16<br>(14.22) | 101.9<br>(19.28) | 100.0<br>(13.72)  | 101.41<br>(17.87) | 95.0<br>(14.45)  | 105.0<br>(14.98)  | 98.12<br>(14.9)  | 92.83<br>(6.55)  | 86.67<br>(30.66) | 90.78<br>(16.48) | 104.5<br>(15.8)  | 107.43<br>(17.32) | 105.44<br>(16.3) |
| total                                     | 108.87<br>(12.33) | 108.07<br>(15.99) | 108.55<br>(13.83) | 105.45<br>(14.18) | 106.06<br>(16.29) | 105.74<br>(15.11) | 99.25<br>(17.89) | 100.75<br>(15.48) | 99.66<br>(17.17)  | 91.74<br>(16.36) | 102.5<br>(12.62)  | 94.27<br>(16.11) | 79.09<br>(19.1)  | 78.0<br>(20.44)  | 78.74<br>(19.23) | 98.49<br>(18.38) | 102.18<br>(18.12) | 99.79<br>(18.35) |

**Stroop Interference Test**

|                      |                  |                  |                  |                 |                  |                  |                  |                  |                 |                  |                 |                  |                 |                 |                 |                  |                  |                  |
|----------------------|------------------|------------------|------------------|-----------------|------------------|------------------|------------------|------------------|-----------------|------------------|-----------------|------------------|-----------------|-----------------|-----------------|------------------|------------------|------------------|
| ≤ 12 education years | 46.23<br>(16.66) | 47.23<br>(10.54) | 46.73<br>(13.67) | 45.9<br>(9.07)  | 44.0<br>(10.56)  | 44.66<br>(9.95)  | 41.33<br>(8.55)  | 43.1<br>(10.05)  | 41.85<br>(8.9)  | 38.52<br>(13.7)  | 40.5<br>(10.29) | 38.88<br>(13.02) | 28.25<br>(5.74) | 24.62<br>(3.58) | 27.04<br>(5.34) | 39.38<br>(12.66) | 41.45<br>(11.85) | 40.17<br>(12.35) |
| > 12 education years | 51.88<br>(8.82)  | 53.36<br>(12.83) | 52.4<br>(10.26)  | 46.48<br>(8.13) | 56.47<br>(13.04) | 50.05<br>(11.11) | 48.14<br>(11.03) | 44.6<br>(11.44)  | 47.21<br>(11.1) | 38.36<br>(4.92)  | 42.4<br>(9.21)  | 39.62<br>(6.52)  | 31.33<br>(6.92) | 12.0<br>(4.24)  | 26.5<br>(10.81) | 46.55<br>(10.34) | 49.48<br>(15.13) | 47.49<br>(12.1)  |
| total                | 50.0<br>(12.09)  | 50.41<br>(11.98) | 50.17<br>(11.95) | 46.32<br>(8.27) | 49.5<br>(13.13)  | 47.85<br>(10.91) | 45.0<br>(10.45)  | 43.85<br>(10.51) | 44.68<br>(10.4) | 38.47<br>(11.77) | 41.36<br>(9.37) | 39.12<br>(11.25) | 29.09<br>(6.08) | 22.1<br>(6.35)  | 26.91<br>(6.9)  | 43.12<br>(12.02) | 45.07<br>(13.95) | 43.8<br>(12.74)  |

**Trail Making Test - Part-A**

|                      |                  |                 |                 |                 |                  |                  |                  |                  |                  |                  |                  |                  |                  |                  |                  |                  |                  |                  |
|----------------------|------------------|-----------------|-----------------|-----------------|------------------|------------------|------------------|------------------|------------------|------------------|------------------|------------------|------------------|------------------|------------------|------------------|------------------|------------------|
| ≤ 12 education years | 31.55<br>(10.57) | 26.42<br>(6.99) | 28.87<br>(9.06) | 30.1<br>(12.15) | 28.0<br>(11.78)  | 28.75<br>(11.73) | 35.62<br>(12.58) | 50.6<br>(67.07)  | 40.03<br>(37.22) | 41.74<br>(16.02) | 37.17<br>(16.7)  | 40.91<br>(15.98) | 61.31<br>(40.59) | 53.57<br>(21.92) | 58.96<br>(35.6)  | 41.03<br>(23.23) | 36.32<br>(32.29) | 39.26<br>(26.98) |
| > 12 education years | 23.64<br>(7.21)  | 22.36<br>(6.61) | 23.18<br>(6.94) | 26.21<br>(7.76) | 21.31<br>(6.14)  | 24.49<br>(7.53)  | 29.86<br>(8.37)  | 28.9<br>(11.38)  | 29.61<br>(9.1)   | 35.0<br>(10.47)  | 27.0<br>(4.12)   | 32.5<br>(9.61)   | 33.2<br>(4.76)   | 47.33<br>(33.53) | 38.5<br>(19.69)  | 28.03<br>(8.74)  | 25.69<br>(12.08) | 27.27<br>(9.97)  |
| total                | 26.06<br>(9.01)  | 24.23<br>(6.96) | 25.29<br>(8.2)  | 27.35<br>(9.24) | 25.19<br>(10.25) | 26.32<br>(9.72)  | 32.52<br>(10.81) | 39.75<br>(48.13) | 34.53<br>(26.73) | 39.79<br>(14.82) | 32.55<br>(13.21) | 38.16<br>(14.66) | 54.62<br>(37.29) | 51.7<br>(24.06)  | 53.68<br>(33.21) | 34.35<br>(18.5)  | 31.44<br>(25.56) | 33.33<br>(21.25) |

**Trail Making Test - Part-B**

|                      |                  |                  |                  |                  |                  |                  |                  |                 |                  |                  |                  |                   |                   |                   |                   |                   |                  |                  |
|----------------------|------------------|------------------|------------------|------------------|------------------|------------------|------------------|-----------------|------------------|------------------|------------------|-------------------|-------------------|-------------------|-------------------|-------------------|------------------|------------------|
| ≤ 12 education years | 83.36<br>(53.01) | 81.42<br>(55.53) | 82.35<br>(53.1)  | 53.7<br>(21.19)  | 58.33<br>(13.04) | 56.68<br>(16.18) | 98.71<br>(59.8)  | 70.9<br>(62.19) | 90.53<br>(60.93) | 107.0<br>(51.88) | 109.33<br>(77.8) | 107.44<br>(56.11) | 152.81<br>(65.83) | 133.0<br>(60.35)  | 146.78<br>(63.52) | 104.02<br>(60.59) | 81.57<br>(55.07) | 95.52<br>(59.38) |
| > 12 education years | 51.08<br>(27.22) | 59.36<br>(23)    | 54.05<br>(25.79) | 52.83<br>(22.67) | 46.38<br>(21.59) | 50.57<br>(22.21) | 55.93<br>(21.25) | 54.3<br>(41.18) | 55.5<br>(27.25)  | 74.27<br>(30.09) | 50.8<br>(6.42)   | 66.94<br>(27.22)  | 95.0<br>(81.71)   | 111.67<br>(67.26) | 101.25<br>(71.99) | 58.1<br>(31.15)   | 57.02<br>(32.93) | 57.75<br>(31.63) |
| total                | 60.94<br>(39.22) | 69.54<br>(41.92) | 64.55<br>(40.27) | 53.09<br>(21.93) | 53.32<br>(17.85) | 53.2<br>(19.93)  | 75.67<br>(48.12) | 62.6<br>(52.03) | 72.04<br>(49.22) | 97.27<br>(48.49) | 82.73<br>(63.07) | 93.94<br>(51.82)  | 139.05<br>(72.26) | 126.6<br>(59.49)  | 135.03<br>(67.66) | 80.29<br>(52.84)  | 70.3<br>(47.64)  | 76.77<br>(51.2)  |

**Letter Fluency Test Total (the sum of all three letters)**

|                      |                  |                  |                  |                  |                  |                  |                 |                  |                  |                  |                  |                  |                  |                  |                  |                  |                 |                  |
|----------------------|------------------|------------------|------------------|------------------|------------------|------------------|-----------------|------------------|------------------|------------------|------------------|------------------|------------------|------------------|------------------|------------------|-----------------|------------------|
| ≤ 12 education years | 35<br>(12.68)    | 28.25<br>(6.63)  | 31.62<br>(10.48) | 36.8<br>(10.62)  | 35.33<br>(10.99) | 35.86<br>(10.69) | 35.48<br>(9.48) | 43.6<br>(18.8)   | 37.94<br>(13.25) | 30.35<br>(9.97)  | 39.67<br>(8.36)  | 32.09<br>(10.25) | 25.75<br>(12.9)  | 28.43<br>(10)    | 26.57<br>(11.93) | 32.24<br>(11.34) | 34.87<br>(12.7) | 33.24<br>(11.89) |
| > 12 education years | 41.16<br>(8.65)  | 40.31<br>(10.94) | 40.87<br>(9.36)  | 46.71<br>(11.79) | 46.46<br>(11.62) | 46.62<br>(11.56) | 43.89<br>(9.93) | 41.9<br>(17.55)  | 43.37<br>(12.15) | 39.82<br>(10.36) | 44.2<br>(12.76)  | 41.19<br>(10.93) | 38.4<br>(7.89)   | 39.67<br>(11.59) | 38.88<br>(8.63)  | 43.11<br>(10.23) | 42.89<br>(12.8) | 43.04<br>(11.08) |
| total                | 39.16<br>(10.37) | 34.52<br>(10.86) | 37.29<br>(10.73) | 43.79<br>(12.19) | 40<br>(12.39)    | 41.98<br>(12.34) | 40.1<br>(10.52) | 42.75<br>(17.72) | 40.85<br>(12.87) | 33.16<br>(10.87) | 41.73<br>(10.28) | 35.12<br>(11.23) | 28.76<br>(12.95) | 31.8<br>(11.22)  | 29.74<br>(12.32) | 37.86<br>(12.05) | 38.51<br>(13.3) | 38.08<br>(12.48) |

**Letter Fluency Test - 1. Letter**

|                      |                 |                |                 |                 |                 |                 |                 |                 |                 |                 |                 |                 |                |                 |                 |                 |                 |                 |
|----------------------|-----------------|----------------|-----------------|-----------------|-----------------|-----------------|-----------------|-----------------|-----------------|-----------------|-----------------|-----------------|----------------|-----------------|-----------------|-----------------|-----------------|-----------------|
| ≤ 12 education years | 11.75<br>(4.16) | 9.25<br>(3.05) | 10.5<br>(3.79)  | 12.9<br>(3.48)  | 11.94<br>(4.75) | 12.29<br>(4.29) | 11.48<br>(3.3)  | 13.5<br>(5.68)  | 12.09<br>(4.18) | 9.23<br>(3.91)  | 13.33<br>(2.16) | 10.0<br>(3.97)  | 8.75<br>(5.25) | 10.71<br>(3.35) | 9.35<br>(4.76)  | 10.51<br>(4.21) | 11.62<br>(4.37) | 10.93<br>(4.29) |
| > 12 education years | 13.92<br>(3.29) | 13.0<br>(5.18) | 13.61<br>(3.99) | 15.62<br>(4.17) | 16.23<br>(3.96) | 15.84<br>(4.05) | 14.54<br>(3.91) | 14.2<br>(5.65)  | 14.45<br>(4.35) | 13.91<br>(4.99) | 13.8<br>(3.11)  | 13.88<br>(4.38) | 12.2<br>(4.27) | 14.67<br>(3.51) | 13.12<br>(3.94) | 14.45<br>(3.99) | 14.43<br>(4.66) | 14.45<br>(4.2)  |
| total                | 13.22<br>(3.68) | 11.2<br>(4.62) | 12.4<br>(4.17)  | 14.82<br>(4.12) | 13.74<br>(4.86) | 14.31<br>(4.49) | 13.16<br>(3.93) | 13.85<br>(5.53) | 13.35<br>(4.4)  | 10.62<br>(4.72) | 13.55<br>(2.5)  | 11.29<br>(4.46) | 9.57<br>(5.15) | 11.9<br>(3.73)  | 10.32<br>(4.81) | 12.54<br>(4.54) | 12.9<br>(4.7)   | 12.67<br>(4.59) |

**Letter Fluency Test - 2. Letter**

|                                        |                 |                 |                 |                 |                 |                 |                 |                 |                 |                 |                 |                 |                |                 |                 |                 |                 |                 |
|----------------------------------------|-----------------|-----------------|-----------------|-----------------|-----------------|-----------------|-----------------|-----------------|-----------------|-----------------|-----------------|-----------------|----------------|-----------------|-----------------|-----------------|-----------------|-----------------|
| ≤ 12 education years                   | 10.83<br>(4.63) | 9.42<br>(3.4)   | 10.12<br>(4.04) | 11.0<br>(5.01)  | 10.78<br>(4.08) | 10.86<br>(4.34) | 11.83<br>(4.11) | 13.7<br>(6.9)   | 12.39<br>(5.07) | 9.69<br>(3.17)  | 13.33<br>(4.76) | 10.38<br>(3.72) | 8.19<br>(5.06) | 8.29<br>(4.5)   | 8.22<br>(4.8)   | 10.29<br>(4.33) | 10.98<br>(4.92) | 10.55<br>(4.56) |
| > 12 education years                   | 12.48<br>(3.92) | 13.23<br>(3.83) | 12.74<br>(3.85) | 14.42<br>(3.89) | 14.46<br>(4.77) | 14.43<br>(4.15) | 14.29<br>(3.8)  | 13.0<br>(7.48)  | 13.95<br>(4.95) | 12.27<br>(4.22) | 14.0<br>(6.2)   | 12.81<br>(4.78) | 13.4<br>(4.83) | 11.33<br>(4.93) | 12.62<br>(4.63) | 13.55<br>(3.98) | 13.5<br>(5.25)  | 13.53<br>(4.41) |
| total                                  | 11.95<br>(4.17) | 11.4<br>(4.05)  | 11.73<br>(4.1)  | 13.41<br>(4.46) | 12.32<br>(4.69) | 12.89<br>(4.57) | 13.18<br>(4.09) | 13.35<br>(7.01) | 13.23<br>(5.03) | 10.46<br>(3.66) | 13.64<br>(5.18) | 11.19<br>(4.22) | 9.43<br>(5.39) | 9.2<br>(4.59)   | 9.35<br>(5.07)  | 11.97<br>(4.45) | 12.12<br>(5.2)  | 12.03<br>(4.72) |
| <b>Letter Fluency Test - 3. Letter</b> |                 |                 |                 |                 |                 |                 |                 |                 |                 |                 |                 |                 |                |                 |                 |                 |                 |                 |
| ≤ 12 education years                   | 12.42<br>(6.27) | 9.58<br>(2.81)  | 11.0<br>(4.97)  | 12.9<br>(3.9)   | 12.61<br>(3.62) | 12.71<br>(3.65) | 12.17<br>(3.88) | 16.4<br>(7.47)  | 13.45<br>(5.47) | 11.42<br>(4.54) | 13.0<br>(3.58)  | 11.72<br>(4.37) | 8.81<br>(3.39) | 9.43<br>(4.12)  | 9.0<br>(3.54)   | 11.45<br>(4.51) | 12.26<br>(4.99) | 11.76<br>(4.69) |
| > 12 education years                   | 14.76<br>(3.69) | 14.08<br>(4.37) | 14.53<br>(3.89) | 16.67<br>(4.98) | 15.77<br>(4.02) | 16.35<br>(4.63) | 15.07<br>(3.73) | 14.7<br>(6.34)  | 14.97<br>(4.47) | 13.64<br>(4.01) | 16.4<br>(4.1)   | 14.5<br>(4.12)  | 12.8<br>(3.9)  | 13.67<br>(3.51) | 13.12<br>(3.52) | 15.11<br>(4.18) | 14.95<br>(4.61) | 15.06<br>(4.3)  |
| total                                  | 14.0<br>(4.73)  | 11.92<br>(4.29) | 13.16<br>(4.63) | 15.56<br>(4.95) | 13.94<br>(4.05) | 14.78<br>(4.58) | 13.76<br>(4.03) | 15.55<br>(6.8)  | 14.27<br>(4.98) | 12.08<br>(4.46) | 14.55<br>(4.03) | 12.65<br>(4.45) | 9.76<br>(3.83) | 10.7<br>(4.27)  | 10.06<br>(3.93) | 13.34<br>(4.7)  | 13.48<br>(4.98) | 13.39<br>(4.79) |

Note: Symbol Digit Modalities Test (min.-max.: 0–110 points in 90 sec); Category fluency (number of correct words - animals in 60 sec); Stroop in each test (min.-max.: 0–200 in 45 sec); Trail Making Test, Part A and Part B (both time in sec, max. 240 sec, the longer time elapsed, the worse performance); Letter fluency test (number of correct words for three letters in 60 sec each, i.e. in total 180 sec).

**Supplementary Material Table 8**

Means and standard deviations for each cognitive test for the Italian sample stratified by age, education, and gender.

|                                           | Age Group        |                  |                  |                   |                   |                   |                  |                  |                  |                  |                   |                  |                  |                  |                  |                  |                  |                  |
|-------------------------------------------|------------------|------------------|------------------|-------------------|-------------------|-------------------|------------------|------------------|------------------|------------------|-------------------|------------------|------------------|------------------|------------------|------------------|------------------|------------------|
|                                           | 18-34 years      |                  |                  | 35-44 years       |                   |                   | 45-54 years      |                  |                  | 55-64 years      |                   |                  | > 64 years       |                  |                  | Total            |                  |                  |
|                                           | female           | male             | all              | female            | male              | all               | female           | male             | all              | female           | male              | all              | female           | male             | all              | female           | male             | all              |
| <b>Symbol Digit Modalities Test</b>       |                  |                  |                  |                   |                   |                   |                  |                  |                  |                  |                   |                  |                  |                  |                  |                  |                  |                  |
| ≤ 12 education years                      | 42.25<br>(9.18)  | 46.43<br>(13.54) | 44.2<br>(11.19)  | 47.78<br>(12.04)  | 41.17<br>(5.85)   | 45.13<br>(10.31)  | 40.21<br>(10.13) | 32.56<br>(7.43)  | 37.22<br>(9.77)  | 32.62<br>(11.13) | 37.25<br>(6.08)   | 33.71<br>(10.2)  | 25.8<br>(10.89)  | 26.17<br>(10.59) | 26.0<br>(10.18)  | 38.45<br>(12.27) | 36.59<br>(11.34) | 37.72<br>(11.88) |
| > 12 education years                      | 54.26<br>(10.67) | 46.52<br>(7.87)  | 51.14<br>(10.3)  | 51.76<br>(12.17)  | 49.35<br>(10.92)  | 50.38<br>(11.38)  | 44.61<br>(10.59) | 48.58<br>(10.82) | 46.2<br>(10.68)  | 39.57<br>(9.4)   | 46.75<br>(11.21)  | 42.18<br>(10.45) | NA<br>(NA)       | 36.75<br>(8.73)  | 36.75<br>(8.73)  | 49.18<br>(12.02) | 47.27<br>(10.04) | 48.31<br>(11.16) |
| total                                     | 51.98<br>(11.35) | 46.5<br>(9.22)   | 49.69<br>(10.79) | 50.38<br>(12.04)  | 47.66<br>(10.55)  | 48.95<br>(11.25)  | 42.69<br>(10.46) | 41.71<br>(12.35) | 42.3<br>(11.14)  | 36.22<br>(10.67) | 43.58<br>(10.58)  | 38.49<br>(11.05) | 25.8<br>(10.89)  | 30.4<br>(10.84)  | 28.87<br>(10.7)  | 45.2<br>(13.14)  | 43.92<br>(11.54) | 44.64<br>(12.46) |
| <b>Categorical Fluency Test (Animals)</b> |                  |                  |                  |                   |                   |                   |                  |                  |                  |                  |                   |                  |                  |                  |                  |                  |                  |                  |
| ≤ 12 education years                      | 21.88<br>(3.8)   | 20.71<br>(7.59)  | 21.33<br>(5.68)  | 20.22<br>(5.31)   | 17.17<br>(3.6)    | 19.0<br>(4.81)    | 17.0<br>(3.51)   | 17.89<br>(7.77)  | 17.35<br>(5.42)  | 19.92<br>(6.44)  | 22.25<br>(3.3)    | 20.47<br>(5.84)  | 16.83<br>(7.94)  | 15.43<br>(3.69)  | 16.08<br>(5.79)  | 19.1<br>(5.48)   | 18.36<br>(6.07)  | 18.81<br>(5.7)   |
| > 12 education years                      | 21.79<br>(4.73)  | 22.74<br>(7.93)  | 22.18<br>(6.17)  | 22.47<br>(6.08)   | 22.21<br>(4.46)   | 22.32<br>(5.13)   | 19.94<br>(5.26)  | 20.33<br>(4.72)  | 20.1<br>(4.97)   | 20.36<br>(4.8)   | 21.75<br>(5.28)   | 20.86<br>(4.9)   | NA<br>(NA)       | 15.5<br>(1.91)   | 15.5<br>(1.91)   | 21.29<br>(5.15)  | 21.63<br>(5.98)  | 21.45<br>(5.53)  |
| total                                     | 21.81<br>(4.52)  | 22.27<br>(7.77)  | 22.0<br>(6.04)   | 21.69<br>(5.82)   | 21.2<br>(4.72)    | 21.43<br>(5.21)   | 18.66<br>(4.75)  | 19.29<br>(6.16)  | 18.91<br>(5.3)   | 20.15<br>(5.54)  | 21.92<br>(4.56)   | 20.69<br>(5.26)  | 16.83<br>(7.94)  | 15.45<br>(3.05)  | 15.94<br>(5.09)  | 20.47<br>(5.36)  | 20.6<br>(6.17)   | 20.52<br>(5.72)  |
| <b>Stroop Color Naming Test</b>           |                  |                  |                  |                   |                   |                   |                  |                  |                  |                  |                   |                  |                  |                  |                  |                  |                  |                  |
| ≤ 12 education years                      | 70.0<br>(11.67)  | 83.14<br>(8.3)   | 76.13<br>(11.99) | 71.11<br>(13.23)  | 67.33<br>(9.18)   | 69.6<br>(11.57)   | 67.21<br>(12.9)  | 61.33<br>(26.46) | 64.91<br>(19.01) | 64.46<br>(13.09) | 59.25<br>(14.8)   | 63.24<br>(13.22) | 62.0<br>(9.19)   | 58.86<br>(13.87) | 60.31<br>(11.58) | 67.02<br>(12.33) | 66.27<br>(18.58) | 66.72<br>(15.03) |
| > 12 education years                      | 72.62<br>(15.27) | 72.65<br>(12.12) | 72.63<br>(13.97) | 73.76<br>(8.65)   | 79.79<br>(11.45)  | 77.29<br>(10.7)   | 72.0<br>(15.35)  | 71.83<br>(10.64) | 71.93<br>(13.46) | 72.14<br>(10.88) | 80.38<br>(14.42)  | 75.14<br>(12.61) | NA<br>(NA)       | 60.5<br>(23.61)  | 60.5<br>(23.61)  | 72.64<br>(13.28) | 75.11<br>(13.36) | 73.78<br>(13.33) |
| total                                     | 72.12<br>(14.56) | 75.1<br>(12.08)  | 73.36<br>(13.57) | 72.85<br>(10.27)  | 77.3<br>(12.01)   | 75.23<br>(11.36)  | 69.91<br>(14.31) | 67.33<br>(19.25) | 68.89<br>(16.32) | 68.44<br>(12.39) | 73.33<br>(17.33)  | 69.95<br>(14.04) | 62.0<br>(9.19)   | 59.45<br>(16.84) | 60.35<br>(14.32) | 70.53<br>(13.17) | 72.31<br>(15.67) | 71.31<br>(14.32) |
| <b>Stroop Word Reading Test</b>           |                  |                  |                  |                   |                   |                   |                  |                  |                  |                  |                   |                  |                  |                  |                  |                  |                  |                  |
| ≤ 12 education years                      | 81.25<br>(16.59) | 101.43<br>(2.99) | 90.67<br>(15.81) | 95.0<br>(19.98)   | 94.83<br>(13.48)  | 94.93<br>(17.12)  | 86.0<br>(18.17)  | 87.78<br>(11.04) | 86.7<br>(15.5)   | 81.54<br>(17.02) | 91.0<br>(24.47)   | 83.76<br>(18.62) | 74.83<br>(27.52) | 73.86<br>(20.06) | 74.31<br>(22.74) | 84.36<br>(19.41) | 89.39<br>(16.83) | 86.36<br>(18.49) |
| > 12 education years                      | 99.09<br>(15.34) | 95.74<br>(15.02) | 97.74<br>(15.17) | 103.0<br>(15.56)  | 102.08<br>(13.08) | 102.46<br>(13.98) | 96.22<br>(14.22) | 101.0<br>(11.1)  | 98.13<br>(13.07) | 88.5<br>(15.88)  | 101.75<br>(10.55) | 93.32<br>(15.35) | NA<br>(NA)       | 92.25<br>(23.27) | 92.25<br>(23.27) | 97.48<br>(15.67) | 99.25<br>(13.85) | 98.3<br>(14.83)  |
| total                                     | 95.69<br>(16.93) | 97.07<br>(13.38) | 96.26<br>(15.46) | 100.23<br>(17.26) | 100.63<br>(13.26) | 100.45<br>(15.1)  | 91.75<br>(16.61) | 95.33<br>(12.71) | 93.17<br>(15.16) | 85.15<br>(16.5)  | 98.17<br>(16.19)  | 89.15<br>(17.3)  | 74.83<br>(27.52) | 80.55<br>(22.14) | 78.53<br>(23.47) | 92.55<br>(18.25) | 96.12<br>(15.48) | 94.12<br>(17.15) |



**Stroop Interference Test**

|                      |                 |                 |                 |                 |                  |                  |                 |                 |                 |                 |                 |                 |                |                  |                  |                 |                  |                 |
|----------------------|-----------------|-----------------|-----------------|-----------------|------------------|------------------|-----------------|-----------------|-----------------|-----------------|-----------------|-----------------|----------------|------------------|------------------|-----------------|------------------|-----------------|
| ≤ 12 education years | 38.25<br>(7.87) | 46.0<br>(8.64)  | 41.87<br>(8.89) | 38.75<br>(9.13) | 34.83<br>(7.14)  | 37.07<br>(8.28)  | 39.75<br>(6.48) | 36.5<br>(11.47) | 38.67<br>(8.27) | 41.0<br>(6.4)   | 43.5<br>(9.26)  | 41.77<br>(7.08) | 30.8<br>(9.65) | 26.75<br>(4.43)  | 29.0<br>(7.65)   | 38.48<br>(7.89) | 38.19<br>(10.42) | 38.36<br>(8.89) |
| > 12 education years | 45.93<br>(8.59) | 42.83<br>(7.36) | 44.56<br>(8.14) | 43.88<br>(7.39) | 44.71<br>(12.1)  | 44.35<br>(10.21) | 39.31<br>(12.7) | 39.33<br>(9.08) | 39.32<br>(11.1) | 42.0<br>(7.53)  | 46.86<br>(9.34) | 43.79<br>(8.34) | NA<br>(NA)     | 47.5<br>(19.43)  | 47.5<br>(19.43)  | 43.38<br>(9.43) | 43.49<br>(10.35) | 43.44<br>(9.85) |
| total                | 44.27<br>(8.93) | 43.57<br>(7.65) | 43.96<br>(8.32) | 42.17<br>(8.19) | 42.52<br>(11.83) | 42.35<br>(10.18) | 39.5<br>(10.33) | 38.39<br>(9.69) | 39.07<br>(9.99) | 41.57<br>(6.92) | 45.64<br>(8.99) | 42.97<br>(7.8)  | 30.8<br>(9.65) | 37.12<br>(17.13) | 34.69<br>(14.57) | 41.59<br>(9.18) | 41.97<br>(10.6)  | 41.76<br>(9.82) |

**Trail Making Test - Part-A**

|                      |                  |                 |                  |                  |                 |                  |                  |                 |                  |                  |                 |                  |                 |                 |                  |                  |                  |                  |
|----------------------|------------------|-----------------|------------------|------------------|-----------------|------------------|------------------|-----------------|------------------|------------------|-----------------|------------------|-----------------|-----------------|------------------|------------------|------------------|------------------|
| ≤ 12 education years | 34.17<br>(12.98) | 34.0<br>(12.23) | 34.08<br>(12.03) | 25.38<br>(8.35)  | 31.17<br>(11.6) | 27.86<br>(9.91)  | 38.18<br>(14.97) | 35.2<br>(8.93)  | 37.25<br>(13.14) | 30.83<br>(7.88)  | 36.75<br>(9.22) | 33.2<br>(8.5)    | 49.25<br>(8.96) | 53.6<br>(18.69) | 51.67<br>(14.49) | 34.57<br>(13.16) | 37.77<br>(14.18) | 35.93<br>(13.58) |
| > 12 education years | 28.7<br>(8.59)   | 28.1<br>(9.06)  | 28.45<br>(8.7)   | 32.21<br>(12.51) | 25.71<br>(9.3)  | 28.65<br>(11.17) | 33.14<br>(11.02) | 31.0<br>(8.63)  | 32.2<br>(9.9)    | 37.27<br>(19.06) | 24.2<br>(6.65)  | 33.19<br>(17.12) | NA<br>(NA)      | 56.0<br>(37.32) | 56.0<br>(37.32)  | 31.82<br>(12.27) | 29.09<br>(12.93) | 30.57<br>(12.6)  |
| total                | 29.7<br>(9.53)   | 29.46<br>(9.94) | 29.59<br>(9.63)  | 29.73<br>(11.46) | 27.13<br>(9.97) | 28.4<br>(10.69)  | 35.36<br>(12.87) | 32.31<br>(8.65) | 34.17<br>(11.39) | 35.0<br>(16.02)  | 29.78<br>(9.88) | 33.19<br>(14.21) | 49.25<br>(8.96) | 54.5<br>(24.48) | 52.75<br>(20.24) | 32.77<br>(12.59) | 31.84<br>(13.86) | 32.36<br>(13.14) |

**Trail Making Test - Part-B**

|                      |                  |                  |                  |                  |                  |                  |                  |                  |                  |                  |                  |                  |                   |                  |                   |                  |                  |                  |
|----------------------|------------------|------------------|------------------|------------------|------------------|------------------|------------------|------------------|------------------|------------------|------------------|------------------|-------------------|------------------|-------------------|------------------|------------------|------------------|
| ≤ 12 education years | 67.0<br>(18.12)  | 80.83<br>(38.03) | 73.92<br>(29.31) | 74.12<br>(33.27) | 69.67<br>(19.48) | 72.21<br>(27.33) | 90.27<br>(23.32) | 101.8<br>(63.61) | 93.88<br>(38.37) | 66.83<br>(32.41) | 104.5<br>(47.54) | 81.9<br>(41.42)  | 137.75<br>(84.22) | 126.0<br>(25.43) | 131.22<br>(54.97) | 84.0<br>(41.17)  | 94.62<br>(42.49) | 88.52<br>(41.72) |
| > 12 education years | 58.93<br>(26.75) | 64.4<br>(25.73)  | 61.26<br>(26.18) | 59.79<br>(13.27) | 65.71<br>(33.25) | 63.03<br>(25.98) | 87.15<br>(56.85) | 65.82<br>(16.33) | 77.38<br>(43.82) | 70.91<br>(32.57) | 47.6<br>(18.49)  | 63.62<br>(30.38) | NA<br>(NA)        | 68.67<br>(23.86) | 68.67<br>(23.86)  | 66.78<br>(34.96) | 63.8<br>(25.91)  | 65.4<br>(31.01)  |
| total                | 60.39<br>(25.35) | 68.19<br>(29.02) | 63.83<br>(27.07) | 65.0<br>(22.97)  | 66.74<br>(29.89) | 65.89<br>(26.44) | 88.58<br>(43.87) | 77.06<br>(39.41) | 83.97<br>(42.02) | 69.47<br>(31.55) | 72.89<br>(43.79) | 70.65<br>(35.4)  | 137.75<br>(84.22) | 104.5<br>(37.58) | 115.58<br>(55.69) | 72.81<br>(37.95) | 73.57<br>(34.95) | 73.15<br>(36.53) |

**Letter Fluency Test Total (the sum of all three letters)**

|                      |                  |                  |                  |                  |                  |                  |                  |                  |                  |                 |                 |                 |                 |                  |                  |                  |                  |                  |
|----------------------|------------------|------------------|------------------|------------------|------------------|------------------|------------------|------------------|------------------|-----------------|-----------------|-----------------|-----------------|------------------|------------------|------------------|------------------|------------------|
| ≤ 12 education years | 37.17<br>(12.02) | 26.4<br>(8.71)   | 32.27<br>(11.59) | 38<br>(10.98)    | 32.33<br>(6.15)  | 35.57<br>(9.38)  | 31.27<br>(10.85) | 29.25<br>(3.86)  | 30.73<br>(9.39)  | 46.83<br>(6.01) | 33.25<br>(7.93) | 41.4<br>(9.5)   | 26.75<br>(9.74) | 20.75<br>(10.97) | 23.75<br>(10.12) | 35.97<br>(11.56) | 28.65<br>(8.34)  | 33.07<br>(10.93) |
| > 12 education years | 41.52<br>(10.8)  | 36.72<br>(13.82) | 39.6<br>(12.18)  | 46.21<br>(11.98) | 41.44<br>(13.61) | 43.67<br>(12.88) | 35.47<br>(14.62) | 43.45<br>(12.18) | 38.85<br>(13.97) | 38.62<br>(8.03) | 39.6<br>(7.09)  | 39.0<br>(7.39)  | NA<br>(NA)      | 36.0<br>(10.54)  | 36.0<br>(10.54)  | 40.77<br>(12.1)  | 39.77<br>(12.66) | 40.32<br>(12.32) |
| total                | 40.73<br>(10.96) | 34.48<br>(13.43) | 38.16<br>(12.32) | 43.23<br>(12.06) | 38.95<br>(12.59) | 41.09<br>(12.37) | 33.69<br>(13.09) | 39.67<br>(12.31) | 35.88<br>(12.98) | 42.14<br>(8.15) | 36.78<br>(7.74) | 40.04<br>(8.26) | 26.75<br>(9.74) | 27.29<br>(12.79) | 27.09<br>(11.26) | 39.07<br>(12.08) | 36.41<br>(12.57) | 37.91<br>(12.33) |

**Letter Fluency Test - 1. Letter**

|                      |                 |                 |                 |                 |                 |                 |                 |                 |                 |                 |                |                 |                |                 |                 |                 |                 |                 |
|----------------------|-----------------|-----------------|-----------------|-----------------|-----------------|-----------------|-----------------|-----------------|-----------------|-----------------|----------------|-----------------|----------------|-----------------|-----------------|-----------------|-----------------|-----------------|
| ≤ 12 education years | 16.33<br>(4.63) | 8.6<br>(2.51)   | 12.82<br>(5.44) | 13.88<br>(4.32) | 12.67<br>(2.8)  | 13.36<br>(3.67) | 11.27<br>(4.08) | 11.75<br>(3.5)  | 11.4<br>(3.81)  | 16.5<br>(2.17)  | 12.0<br>(3.56) | 14.7<br>(3.5)   | 8.25<br>(4.19) | 7.5<br>(1.0)    | 7.88<br>(2.85)  | 13.29<br>(4.69) | 10.61<br>(3.3)  | 12.22<br>(4.37) |
| > 12 education years | 15.19<br>(4.63) | 13.33<br>(5.65) | 14.44<br>(5.08) | 16.5<br>(5.13)  | 14.75<br>(5.78) | 15.57<br>(5.46) | 12.33<br>(5.37) | 14.45<br>(5.24) | 13.23<br>(5.32) | 14.5<br>(4.11)  | 15.6<br>(2.51) | 14.92<br>(3.5)  | NA<br>(NA)     | 13.33<br>(6.81) | 13.33<br>(6.81) | 14.72<br>(4.97) | 14.21<br>(5.31) | 14.49<br>(5.11) |
| total                | 15.39<br>(4.58) | 12.3<br>(5.46)  | 14.12<br>(5.15) | 15.55<br>(4.92) | 14.18<br>(5.16) | 14.86<br>(5.03) | 11.88<br>(4.8)  | 13.73<br>(4.88) | 12.56<br>(4.85) | 15.36<br>(3.46) | 14.0<br>(3.39) | 14.83<br>(3.42) | 8.25<br>(4.19) | 10.0<br>(5.07)  | 9.36<br>(4.63)  | 14.21<br>(4.9)  | 13.12<br>(5.05) | 13.74<br>(4.98) |

**Letter Fluency Test - 2. Letter**

|                                        |                 |                 |                 |                 |                 |                 |                 |                 |                 |                 |                 |                 |                |                 |                 |                 |                 |                 |
|----------------------------------------|-----------------|-----------------|-----------------|-----------------|-----------------|-----------------|-----------------|-----------------|-----------------|-----------------|-----------------|-----------------|----------------|-----------------|-----------------|-----------------|-----------------|-----------------|
| ≤ 12 education years                   | 12.33<br>(5.09) | 10.4<br>(3.05)  | 11.45<br>(4.2)  | 14.38<br>(4.57) | 11.83<br>(4.17) | 13.29<br>(4.43) | 10.82<br>(4.49) | 11.75<br>(1.5)  | 11.07<br>(3.88) | 16.33<br>(2.88) | 12.75<br>(4.19) | 14.9<br>(3.73)  | 10.5<br>(3.11) | 6.75<br>(5.56)  | 8.62<br>(4.63)  | 12.8<br>(4.56)  | 10.78<br>(4.09) | 12.0<br>(4.46)  |
| > 12 education years                   | 15.11<br>(3.63) | 13.61<br>(5.75) | 14.51<br>(4.6)  | 16.57<br>(4.11) | 14.69<br>(5.46) | 15.57<br>(4.89) | 13.67<br>(5.29) | 16.27<br>(5.12) | 14.77<br>(5.28) | 13.5<br>(2.78)  | 12.8<br>(4.66)  | 13.23<br>(3.44) | NA<br>(NA)     | 11.33<br>(4.16) | 11.33<br>(4.16) | 14.89<br>(4.15) | 14.28<br>(5.34) | 14.62<br>(4.72) |
| total                                  | 14.61<br>(3.99) | 12.91<br>(5.39) | 13.91<br>(4.65) | 15.77<br>(4.31) | 13.91<br>(5.21) | 14.84<br>(4.82) | 12.46<br>(5.08) | 15.07<br>(4.85) | 13.41<br>(5.09) | 14.71<br>(3.07) | 12.78<br>(4.18) | 13.96<br>(3.59) | 10.5<br>(3.11) | 8.71<br>(5.22)  | 9.36<br>(4.48)  | 14.15<br>(4.39) | 13.22<br>(5.23) | 13.75<br>(4.78) |
| <b>Letter Fluency Test - 3. Letter</b> |                 |                 |                 |                 |                 |                 |                 |                 |                 |                 |                 |                 |                |                 |                 |                 |                 |                 |
| ≤ 12 education years                   | 8.5<br>(3.94)   | 7.4<br>(4.28)   | 8.0<br>(3.92)   | 9.75<br>(2.82)  | 7.83<br>(3.37)  | 8.93<br>(3.1)   | 9.18<br>(3.37)  | 5.75<br>(1.71)  | 8.27<br>(3.35)  | 14.0<br>(3.03)  | 8.5<br>(1.73)   | 11.8<br>(3.77)  | 8.0<br>(4.08)  | 6.5<br>(4.8)    | 7.25<br>(4.2)   | 9.89<br>(3.74)  | 7.26<br>(3.28)  | 8.84<br>(3.76)  |
| > 12 education years                   | 11.22<br>(4.44) | 9.78<br>(4.56)  | 10.64<br>(4.49) | 13.14<br>(4.69) | 12.0<br>(3.93)  | 12.53<br>(4.26) | 9.47<br>(5.03)  | 12.73<br>(3.04) | 10.85<br>(4.53) | 10.62<br>(3.29) | 11.2<br>(3.11)  | 10.85<br>(3.11) | NA<br>(NA)     | 11.33<br>(6.51) | 11.33<br>(6.51) | 11.16<br>(4.59) | 11.28<br>(4.1)  | 11.21<br>(4.36) |
| total                                  | 10.73<br>(4.42) | 9.26<br>(4.51)  | 10.12<br>(4.48) | 11.91<br>(4.36) | 10.86<br>(4.17) | 11.39<br>(4.25) | 9.35<br>(4.33)  | 10.87<br>(4.17) | 9.9<br>(4.28)   | 12.07<br>(3.52) | 10.0<br>(2.83)  | 11.26<br>(3.36) | 8.0<br>(4.08)  | 8.57<br>(5.68)  | 8.36<br>(4.95)  | 10.71<br>(4.33) | 10.07<br>(4.27) | 10.43<br>(4.31) |

Note: Symbol Digit Modalities Test (min.-max.: 0–110 points in 90 sec); Category fluency (number of correct words - animals in 60 sec); Stroop in each test (min.-max.: 0–200 in 45 sec); Trail Making Test, Part A and Part B (both time in sec, max. 240 sec, the longer time elapsed, the worse performance); Letter fluency test (number of correct words for three letters in 60 sec each, i.e. in total 180 sec), NaN = no participant was available for this cell, NA = the cell is derived from a single participant.

**Supplementary Material Table 9**

Means and standard deviations for each cognitive test for the Polish sample stratified by age, education, and gender

|                                           | Age Group        |                 |                 |                 |                  |                  |                  |                  |                  |                  |                 |                 |              |                 |                  |                  |                  |                  |
|-------------------------------------------|------------------|-----------------|-----------------|-----------------|------------------|------------------|------------------|------------------|------------------|------------------|-----------------|-----------------|--------------|-----------------|------------------|------------------|------------------|------------------|
|                                           | 18-34 years      |                 |                 | 35-44 years     |                  |                  | 45-54 years      |                  |                  | 55-64 years      |                 |                 | > 64 years   |                 |                  | Total            |                  |                  |
|                                           | female           | male            | all             | female          | male             | all              | female           | male             | all              | female           | male            | all             | female       | male            | all              | female           | male             | all              |
| <b>Symbol Digit Modalities Test</b>       |                  |                 |                 |                 |                  |                  |                  |                  |                  |                  |                 |                 |              |                 |                  |                  |                  |                  |
| ≤ 12 education years                      | 50.2<br>(4.6)    | 48.33<br>(5.92) | 49.18<br>(5.19) | NaN<br>(NA)     | 30.0<br>(NA)     | 30.0<br>(NA)     | 40.25<br>(14.03) | NaN<br>(NA)      | 40.25<br>(14.03) | 33.0<br>(2.83)   | NaN<br>(NA)     | 33.0<br>(2.83)  | 15.0<br>(NA) | NaN<br>(NA)     | 15.0<br>(NA)     | 41.08<br>(13.19) | 45.71<br>(8.79)  | 42.79<br>(11.72) |
| > 12 education years                      | 56.52<br>(8.68)  | 53.76<br>(6.46) | 55.29<br>(7.79) | 51.84<br>(9.78) | 42.0<br>(11.18)  | 49.19<br>(10.89) | 47.0<br>(4.58)   | 47.33<br>(3.79)  | 47.1<br>(4.15)   | 50.0<br>(NA)     | 47.0<br>(4.24)  | 48.0<br>(3.46)  | NaN<br>(NA)  | 51.0<br>(19.8)  | 51.0<br>(19.8)   | 53.15<br>(9.11)  | 49.87<br>(9.28)  | 51.86<br>(9.26)  |
| total                                     | 55.31<br>(8.37)  | 52.35<br>(6.65) | 53.92<br>(7.68) | 51.84<br>(9.78) | 40.5<br>(11.19)  | 48.48<br>(11.3)  | 44.55<br>(9.13)  | 47.33<br>(3.79)  | 45.14<br>(8.23)  | 38.67<br>(10.02) | 47.0<br>(4.24)  | 42.0<br>(8.69)  | 15.0<br>(NA) | 51.0<br>(19.8)  | 39.0<br>(25.06)  | 50.73<br>(11.05) | 49.11<br>(9.22)  | 50.1<br>(10.36)  |
| <b>Categorical Fluency Test (Animals)</b> |                  |                 |                 |                 |                  |                  |                  |                  |                  |                  |                 |                 |              |                 |                  |                  |                  |                  |
| ≤ 12 education years                      | 21.8<br>(4.44)   | 23.0<br>(3.58)  | 22.45<br>(3.83) | NaN<br>(NA)     | 19.0<br>(NA)     | 19.0<br>(NA)     | 19.5<br>(3.11)   | NaN<br>(NA)      | 19.5<br>(3.11)   | 23.0<br>(0.0)    | NaN<br>(NA)     | 23.0<br>(0)     | 9.0<br>(NA)  | NaN<br>(NA)     | 9.0<br>(NA)      | 20.17<br>(4.9)   | 22.43<br>(3.6)   | 21.0<br>(4.5)    |
| > 12 education years                      | 23.05<br>(5.93)  | 24.29<br>(4.57) | 23.61<br>(5.33) | 23.16<br>(4.29) | 21.43<br>(7.7)   | 22.69<br>(5.3)   | 21.17<br>(5.98)  | 24.67<br>(7.57)  | 22.33<br>(6.3)   | 13.0<br>(NA)     | 25.5<br>(0.71)  | 21.33<br>(7.23) | NaN<br>(NA)  | 20.0<br>(5.66)  | 20.0<br>(5.66)   | 22.64<br>(5.37)  | 23.48<br>(5.52)  | 22.97<br>(5.41)  |
| total                                     | 22.81<br>(5.61)  | 23.96<br>(4.29) | 23.35<br>(5.02) | 23.16<br>(4.29) | 21.12<br>(7.18)  | 22.56<br>(5.24)  | 20.5<br>(4.88)   | 24.67<br>(7.57)  | 21.46<br>(5.55)  | 19.67<br>(5.77)  | 25.5<br>(0.71)  | 22.0<br>(5.2)   | 9.0<br>(NA)  | 20.0<br>(5.66)  | 16.33<br>(7.51)  | 22.14<br>(5.33)  | 23.29<br>(5.19)  | 22.59<br>(5.28)  |
| <b>Stroop Color Naming Test</b>           |                  |                 |                 |                 |                  |                  |                  |                  |                  |                  |                 |                 |              |                 |                  |                  |                  |                  |
| ≤ 12 education years                      | 67.8<br>(4.09)   | 74.83<br>(7.63) | 71.64<br>(7.02) | NaN<br>(NA)     | 7.01<br>(NA)     | 71.0<br>(NA)     | 64.25<br>(21.33) | NaN<br>(NA)      | 64.25<br>(21.33) | 76.0<br>(1.41)   | NaN<br>(NA)     | 76.0<br>(1.41)  | 40.0<br>(NA) | NaN<br>(NA)     | 40.0<br>(NA)     | 65.67<br>(14.57) | 74.29<br>(7.11)  | 68.84<br>(12.84) |
| > 12 education years                      | 74.33<br>(11)    | 77.24<br>(8.92) | 75.63<br>(10.1) | 76.0<br>(9.12)  | 62.0<br>(9.3)    | 72.64<br>(10.84) | 68.86<br>(13.35) | 69.67<br>(11.02) | 69.1<br>(12.08)  | 59.0<br>(NA)     | 67.5<br>(10.61) | 64.67<br>(8.96) | NaN<br>(NA)  | 59.5<br>(16.26) | 59.5<br>(16.26)  | 73.88<br>(10.79) | 71.6<br>(11.38)  | 73.0<br>(11.0)   |
| total                                     | 73.08<br>(10.31) | 76.61<br>(8.5)  | 74.73<br>(9.57) | 76.0<br>(9.12)  | 63.29<br>(9.14)  | 72.58<br>(10.63) | 67.18<br>(15.77) | 69.67<br>(11.02) | 67.71<br>(14.53) | 70.33<br>(9.87)  | 67.5<br>(10.61) | 69.2<br>(8.9)   | 40.0<br>(NA) | 59.5<br>(16.26) | 53.0<br>(16.09)  | 72.23<br>(11.97) | 72.11<br>(10.67) | 72.19<br>(11.44) |
| <b>Stroop Word Reading Test</b>           |                  |                 |                 |                 |                  |                  |                  |                  |                  |                  |                 |                 |              |                 |                  |                  |                  |                  |
| ≤ 12 education years                      | 85.8<br>(8.01)   | 93.67<br>(4.13) | 90.09<br>(7.15) | NaN<br>(NA)     | 86.0<br>(NA)     | 86.0<br>(NA)     | 79.25<br>(10.24) | NaN<br>(NA)      | 79.25<br>(10.24) | 84.5<br>(7.78)   | NaN<br>(NA)     | 84.5<br>(7.78)  | 42.0<br>(NA) | NaN<br>(NA)     | 42.0<br>(NA)     | 79.75<br>(14.42) | 92.57<br>(4.76)  | 84.47<br>(13.23) |
| > 12 education years                      | 95.19<br>(8.38)  | 93.94<br>(8.6)  | 94.63<br>(8.39) | 93.63<br>(7.24) | 81.0<br>(11.24)  | 90.6<br>(9.79)   | 90.57<br>(15.84) | 96.0<br>(6.93)   | 92.2<br>(13.6)   | 70.0<br>(NA)     | 92.5<br>(0.71)  | 85.0<br>(13.0)  | NaN<br>(NA)  | 65.0<br>(35.36) | 65.0<br>(35.36)  | 93.38<br>(9.81)  | 89.53<br>(13.49) | 91.9<br>(11.44)  |
| total                                     | 93.38<br>(8.98)  | 93.87<br>(7.59) | 93.61<br>(8.28) | 93.63<br>(7.24) | 81.71<br>(10.44) | 90.42<br>(9.64)  | 86.45<br>(14.65) | 96.0<br>(6.93)   | 88.5<br>(13.75)  | 79.67<br>(10.02) | 92.5<br>(0.71)  | 84.8<br>(9.98)  | 42.0<br>(NA) | 65.0<br>(35.36) | 57.33<br>(28.31) | 90.65<br>(12.07) | 90.11<br>(12.32) | 90.44<br>(12.1)  |

**Stroop Interference Test**

|                      |                  |                 |                  |                |                 |                 |                  |                |                  |               |                |                 |              |                 |                  |                  |                 |                  |
|----------------------|------------------|-----------------|------------------|----------------|-----------------|-----------------|------------------|----------------|------------------|---------------|----------------|-----------------|--------------|-----------------|------------------|------------------|-----------------|------------------|
| ≤ 12 education years | 39.0<br>(6.12)   | 45.5<br>(8.83)  | 42.55<br>(8.09)  | NaN<br>(NA)    | 34.0<br>(NA)    | 34.9<br>(NA)    | 35.25<br>(12.53) | NaN<br>(NA)    | 35.25<br>(12.53) | 38.0<br>(0.0) | NaN<br>(NA)    | 38.0<br>(0.0)   | 15.0<br>(NA) | NaN<br>(NA)     | 15.0<br>(NA)     | 35.58<br>(10.07) | 43.86<br>(9.15) | 38.63<br>(10.33) |
| > 12 education years | 43.95<br>(12.07) | 46.76<br>(7.76) | 45.21<br>(10.34) | 42.26<br>(9.1) | 37.33<br>(7.81) | 41.08<br>(8.91) | 41.43<br>(8.87)  | 41.0<br>(9.64) | 41.3<br>(8.55)   | NaN<br>(NA)   | 39.5<br>(4.95) | 39.5<br>(4.95)  | NaN<br>(NA)  | 39.5<br>(13.44) | 39.5<br>(13.44)  | 42.89<br>(10.34) | 43.33<br>(8.61) | 43.06<br>(9.65)  |
| total                | 43.0<br>(11.25)  | 46.43<br>(7.86) | 44.61<br>(9.86)  | 42.26<br>(9.1) | 36.86<br>(7.24) | 40.81<br>(8.84) | 39.18<br>(10.2)  | 41.0<br>(9.64) | 39.57<br>(9.74)  | 38.0<br>(0.0) | 39.5<br>(4.95) | 38.75<br>(2.99) | 15.0<br>(NA) | 39.5<br>(13.44) | 31.33<br>(17.04) | 41.41<br>(10.63) | 43.43<br>(8.59) | 42.19<br>(9.89)  |

**Trail Making Test - Part-A**

|                      |                 |                 |                 |                  |                 |                  |                 |                 |                 |                 |                 |                 |               |                 |                  |                  |                 |                  |
|----------------------|-----------------|-----------------|-----------------|------------------|-----------------|------------------|-----------------|-----------------|-----------------|-----------------|-----------------|-----------------|---------------|-----------------|------------------|------------------|-----------------|------------------|
| ≤ 12 education years | 28.4<br>(7.7)   | 22.33<br>(5.85) | 25.09<br>(7.13) | NaN<br>(NA)      | 28.0<br>(NA)    | 28.0<br>(NA)     | 29.25<br>(4.5)  | NaN<br>(NA)     | 29.25<br>(4.5)  | 36.5<br>(6.36)  | NaN<br>(NA)     | 36.5<br>(6.36)  | 111.0<br>(NA) | NaN<br>(NA)     | 111.0<br>(NA)    | 36.92<br>(24.17) | 23.14<br>(5.76) | 31.84<br>(20.36) |
| > 12 education years | 25.48<br>(7.68) | 27.24<br>(9.29) | 26.26<br>(8.37) | 27.42<br>(10.75) | 30.14<br>(9.65) | 28.15<br>(10.34) | 33.14<br>(4.3)  | 27.5<br>(12.02) | 31.89<br>(6.17) | 45.0<br>(NA)    | 33.0<br>(14.14) | 37.0<br>(12.17) | NaN<br>(NA)   | 39.5<br>(10.61) | 39.5<br>(10.61)  | 27.77<br>(9.2)   | 29.13<br>(9.68) | 28.29<br>(9.35)  |
| total                | 26.04<br>(7.62) | 25.96<br>(8.68) | 26.0<br>(8.05)  | 27.42<br>(10.75) | 29.88<br>(8.97) | 28.15<br>(10.14) | 31.73<br>(4.58) | 27.5<br>(12.02) | 31.08<br>(5.66) | 39.33<br>(6.66) | 33.0<br>(14.14) | 36.8<br>(9.18)  | 111.0<br>(NA) | 39.5<br>(10.61) | 63.33<br>(41.96) | 29.6<br>(13.78)  | 28.0<br>(9.31)  | 28.99<br>(12.24) |

**Trail Making Test - Part-B**

|                      |                  |                  |                  |                  |                  |                  |                  |                 |                  |                 |                 |                  |               |                 |                   |                  |                  |                  |
|----------------------|------------------|------------------|------------------|------------------|------------------|------------------|------------------|-----------------|------------------|-----------------|-----------------|------------------|---------------|-----------------|-------------------|------------------|------------------|------------------|
| ≤ 12 education years | 81.6<br>(38.84)  | 46.33<br>(9.63)  | 62.36<br>(31.45) | NaN<br>(NA)      | 58.0<br>(NA)     | 58.0<br>(NA)     | 78.25<br>(40.17) | NaN<br>(NA)     | 78.25<br>(40.17) | 81.0<br>(15.56) | NaN<br>(NA)     | 81.0<br>(15.56)  | 218.0<br>(NA) | NaN<br>(NA)     | 218.0<br>(NA)     | 91.75<br>(50.93) | 48.0<br>(9.83)   | 75.63<br>(45.69) |
| > 12 education years | 60.35<br>(27.91) | 50.06<br>(18.46) | 55.62<br>(24.28) | 47.37<br>(14.19) | 71.29<br>(37.36) | 53.81<br>(24.44) | 75.14<br>(37.78) | 62.5<br>(13.44) | 72.33<br>(33.53) | 59.0<br>(NA)    | 64.0<br>(21.21) | 62.33<br>(15.28) | NaN<br>(NA)   | 49.5<br>(20.51) | 49.5<br>(20.51)   | 57.28<br>(26.08) | 56.73<br>(24.49) | 57.06<br>(25.31) |
| total                | 64.6<br>(30.71)  | 49.09<br>(16.48) | 57.17<br>(25.89) | 47.37<br>(14.19) | 69.62<br>(34.91) | 53.96<br>(23.98) | 76.27<br>(36.64) | 62.5<br>(13.44) | 74.15<br>(34.07) | 73.67<br>(16.8) | 64.0<br>(21.21) | 69.8<br>(16.78)  | 218<br>(NA)   | 49.5<br>(20.51) | 105.67<br>(98.36) | 64.29<br>(35.03) | 55.08<br>(22.61) | 60.74<br>(31.04) |

**Letter Fluency Test Total (the sum of all three letters)**

|                      |                  |                 |                  |                  |                  |                  |                 |                 |                 |                  |                |                 |              |                 |                  |                  |                  |                  |
|----------------------|------------------|-----------------|------------------|------------------|------------------|------------------|-----------------|-----------------|-----------------|------------------|----------------|-----------------|--------------|-----------------|------------------|------------------|------------------|------------------|
| ≤ 12 education years | 44.8<br>(3.27)   | 39.83<br>(6.94) | 42.09<br>(5.92)  | NaN<br>(NA)      | 40.0<br>(NA)     | 40.0<br>(NA)     | 44.25<br>(6.5)  | NaN<br>(NA)     | 44.25<br>(6.5)  | 56.5<br>(2.12)   | NaN<br>(NA)    | 56.5<br>(2.12)  | 16.0<br>(NA) | NaN<br>(NA)     | 16.0<br>(NA)     | 44.17<br>(10.76) | 39.86<br>(6.34)  | 42.58<br>(9.42)  |
| > 12 education years | 45.76<br>(10.33) | 45.35<br>(9.97) | 45.58<br>(10.04) | 48.58<br>(12.54) | 38.14<br>(14.78) | 45.77<br>(13.71) | 49.14<br>(5.55) | 48.0<br>(19.92) | 48.8<br>(10.44) | 29.0<br>(NA)     | 42.5<br>(0.71) | 38.0<br>(7.81)  | NaN<br>(NA)  | 32.0<br>(15.56) | 32<br>(15.56)    | 47.02<br>(10.9)  | 42.94<br>(12.27) | 45.42<br>(11.56) |
| total                | 45.58<br>(9.34)  | 43.91<br>(9.45) | 44.8<br>(9.33)   | 48.58<br>(12.54) | 38.38<br>(13.7)  | 45.56<br>(13.49) | 47.36<br>(6.1)  | 48.0<br>(19.92) | 47.5<br>(9.48)  | 47.33<br>(15.95) | 42.5<br>(0.71) | 45.4<br>(11.59) | 16.0<br>(NA) | 32.0<br>(15.56) | 26.67<br>(14.36) | 46.45<br>(10.85) | 42.37<br>(11.4)  | 44.87<br>(11.19) |

**Letter Fluency Test - 1. Letter**

|                      |                 |                 |                 |               |                 |                 |                 |                 |                |                 |                |                 |             |                |                |                 |                 |                 |
|----------------------|-----------------|-----------------|-----------------|---------------|-----------------|-----------------|-----------------|-----------------|----------------|-----------------|----------------|-----------------|-------------|----------------|----------------|-----------------|-----------------|-----------------|
| ≤ 12 education years | 14.2<br>(1.64)  | 12.83<br>(4.45) | 13.45<br>(3.39) | NaN<br>(NA)   | 12.0<br>(NA)    | 12.0<br>(NA)    | 12.25<br>(2.5)  | NaN<br>(NA)     | 12.25<br>(2.5) | 13.5<br>(0.71)  | NaN<br>(NA)    | 13.5<br>(0.71)  | 3.0<br>(NA) | NaN<br>(NA)    | 3.0<br>(NA)    | 12.5<br>(3.53)  | 12.71<br>(4.07) | 12.58<br>(3.63) |
| > 12 education years | 13.81<br>(4.13) | 13.94<br>(3.45) | 13.87<br>(3.79) | 14.0<br>(4.9) | 10.57<br>(3.82) | 13.08<br>(4.82) | 15.14<br>(3.18) | 14.67<br>(4.93) | 15.0<br>(3.5)  | 7.0<br>(NA)     | 13.5<br>(0.71) | 11.33<br>(3.79) | NaN<br>(NA) | 11.5<br>(2.12) | 11.5<br>(2.12) | 13.94<br>(4.36) | 13.06<br>(3.66) | 13.59<br>(4.1)  |
| total                | 13.88<br>(3.76) | 13.65<br>(3.66) | 13.78<br>(3.68) | 14.0<br>(4.9) | 10.75<br>(3.58) | 13.04<br>(4.73) | 14.09<br>(3.18) | 14.67<br>(4.93) | 14.21<br>(3.4) | 11.33<br>(3.79) | 13.5<br>(0.71) | 12.2<br>(2.95)  | 3.0<br>(NA) | 11.5<br>(2.12) | 8.67<br>(5.13) | 13.65<br>(4.22) | 13.0<br>(3.68)  | 13.4<br>(4.01)  |

**Letter Fluency Test - 2. Letter**

|                                        |                 |                 |                 |                 |                 |                 |                 |                  |                 |                 |                |                 |             |                |                |                 |                 |                 |
|----------------------------------------|-----------------|-----------------|-----------------|-----------------|-----------------|-----------------|-----------------|------------------|-----------------|-----------------|----------------|-----------------|-------------|----------------|----------------|-----------------|-----------------|-----------------|
| ≤ 12 education years                   | 15.0<br>(1.87)  | 14.17<br>(3.13) | 14.55<br>(2.54) | NaN<br>(NA)     | 14.0<br>(NA)    | 14.0<br>(NA)    | 16.5<br>(3.0)   | NaN<br>(NA)      | 16.5<br>(3.0)   | 25.0<br>(0.0)   | NaN<br>(NA)    | 25.0<br>(0.0)   | 7.0<br>(NA) | NaN<br>(NA)    | 7.0<br>(NA)    | 16.5<br>(5.11)  | 14.14<br>(2.85) | 15.63<br>(4.47) |
| > 12 education years                   | 17.19<br>(3.86) | 15.53<br>(3.91) | 16.45<br>(3.92) | 18.05<br>(3.78) | 14.14<br>(7.38) | 17.0<br>(5.15)  | 17.57<br>(2.7)  | 18.0<br>(4.36)   | 17.7<br>(3.02)  | 11.0<br>(NA)    | 15.0<br>(0.0)  | 13.67<br>(2.31) | NaN<br>(NA) | 10.0<br>(5.66) | 10.0<br>(5.66) | 17.46<br>(3.71) | 15.06<br>(4.93) | 16.52<br>(4.36) |
| total                                  | 16.77<br>(3.64) | 15.17<br>(3.7)  | 16.02<br>(3.72) | 18.05<br>(3.78) | 14.12<br>(6.83) | 16.89<br>(5.08) | 17.18<br>(2.71) | 18.0<br>(4.36)   | 17.36<br>(2.95) | 20.33<br>(8.08) | 15.0<br>(0.0)  | 18.2<br>(6.42)  | 7.0<br>(NA) | 10<br>(5.66)   | 9.0<br>(4.36)  | 17.27<br>(4.0)  | 14.89<br>(4.6)  | 16.35<br>(4.37) |
| <b>Letter Fluency Test - 3. Letter</b> |                 |                 |                 |                 |                 |                 |                 |                  |                 |                 |                |                 |             |                |                |                 |                 |                 |
| ≤ 12 education years                   | 15.6<br>(1.52)  | 12.83<br>(1.72) | 14.09<br>(2.12) | NaN<br>(NA)     | 14.0<br>(NA)    | 14.0<br>(NA)    | 15.5<br>(3.11)  | NaN<br>(NA)      | 15.5<br>(3.11)  | 18.0<br>(2.83)  | NaN<br>(NA)    | 18.0<br>(2.83)  | 6.0<br>(NA) | NaN<br>(NA)    | 6.0<br>(NA)    | 15.17<br>(3.66) | 13.0<br>(1.63)  | 14.37<br>(3.2)  |
| > 12 education years                   | 14.76<br>(4.25) | 15.88<br>(3.95) | 15.26<br>(4.1)  | 16.53<br>(5.35) | 13.43<br>(4.5)  | 15.69<br>(5.24) | 16.43<br>(2.3)  | 15.33<br>(10.69) | 16.1<br>(5.4)   | 11.0<br>(NA)    | 14.0<br>(1.41) | 13.0<br>(2.0)   | NaN<br>(NA) | 10.5<br>(7.78) | 10.5<br>(7.78) | 15.62<br>(4.53) | 14.81<br>(4.95) | 15.3<br>(4.69)  |
| total                                  | 14.92<br>(3.87) | 15.09<br>(3.73) | 15.0<br>(3.76)  | 16.53<br>(5.35) | 13.5<br>(4.17)  | 15.63<br>(5.15) | 16.09<br>(2.51) | 15.33<br>(10.69) | 15.93<br>(4.75) | 15.67<br>(4.51) | 14.0<br>(1.41) | 15.0<br>(3.39)  | 6.0<br>(NA) | 10.5<br>(7.78) | 9.0<br>(6.08)  | 15.53<br>(4.35) | 14.47<br>(4.56) | 15.12<br>(4.44) |

Note: Symbol Digit Modalities Test (min.-max.: 0–110 points in 90 sec); Category fluency (number of correct words - animals in 60 sec); Stroop in each test (min.-max.: 0–200 in 45 sec); Trail Making Test, Part A and Part B (both time in sec, max. 240 sec, the longer time elapsed, the worse performance); Letter fluency test (number of correct words for three letters in 60 sec each, i.e. in total 180 sec), NaN = no participant was available for this cell, NA = the cell is derived from a single participant

**Supplementary Material Table 10**

Means and standard deviations for each cognitive test for the Canadian French sample stratified by age, education, and gender

|                                           | Age Group        |                  |                   |                  |               |                  |                   |                  |                  |                  |                  |                  |                 |                 |                 |                   |                   |                   |
|-------------------------------------------|------------------|------------------|-------------------|------------------|---------------|------------------|-------------------|------------------|------------------|------------------|------------------|------------------|-----------------|-----------------|-----------------|-------------------|-------------------|-------------------|
|                                           | 18-34 years      |                  |                   | 35-44 years      |               |                  | 45-54 years       |                  |                  | 55-64 years      |                  |                  | > 64 years      |                 |                 | Total             |                   |                   |
|                                           | female           | male             | all               | female           | male          | all              | female            | male             | all              | female           | male             | all              | female          | male            | all             | female            | male              | all               |
| <b>Symbol Digit Modalities Test</b>       |                  |                  |                   |                  |               |                  |                   |                  |                  |                  |                  |                  |                 |                 |                 |                   |                   |                   |
| ≤ 12 education years                      | 54.67<br>(12.37) | 44.5<br>(15.37)  | 50.6<br>(13.83)   | 50.5<br>(2.12)   | NaN<br>(NA)   | 50.5<br>(2.12)   | 49.0<br>(9.66)    | 49.4<br>(9.74)   | 49.22<br>(9.08)  | 44.0<br>(11.69)  | 31.67<br>(9.07)  | 38.71<br>(11.8)  | 40.67<br>(9.07) | 37.0<br>(NA)    | 39.75<br>(7.63) | 48.58<br>(10.87)  | 42.85<br>(12.54)  | 46.25<br>(11.73)  |
| > 12 education years                      | 61.5<br>(9.57)   | 65.4<br>(13.09)  | 63.27<br>(10.88)  | 58.38<br>(6.5)   | 73.0<br>(NA)  | 60.0<br>(7.79)   | 54.12<br>(7.41)   | 50.5<br>(3.54)   | 53.4<br>(6.82)   | 49.0<br>(5.0)    | 46.0<br>(4.58)   | 47.5<br>(4.59)   | 46.0<br>(NA)    | 42.0<br>(NA)    | 44.0<br>(2.83)  | 56.23<br>(8.22)   | 56.75<br>(13.55)  | 56.39<br>(10.01)  |
| total                                     | 58.08<br>(11.13) | 56.11<br>(17.19) | 57.24<br>(13.69)  | 56.8<br>(6.66)   | 73.0<br>(NA)  | 58.27<br>(7.99)  | 52.42<br>(8.17)   | 49.71<br>(8.1)   | 51.42<br>(8.03)  | 46.14<br>(9.15)  | 38.83<br>(10.15) | 42.77<br>(9.96)  | 42.0<br>(7.87)  | 39.5<br>(3.54)  | 41.17<br>(6.43) | 53.0<br>(10.07)   | 49.52<br>(14.6)   | 51.76<br>(11.9)   |
| <b>Categorical Fluency Test (Animals)</b> |                  |                  |                   |                  |               |                  |                   |                  |                  |                  |                  |                  |                 |                 |                 |                   |                   |                   |
| ≤ 12 education years                      | 18.83<br>(5.23)  | 14.75<br>(7.68)  | 17.2<br>(6.27)    | 23.5<br>(3.54)   | NaN<br>(NA)   | 23.5<br>(3.54)   | 18.25<br>(8.62)   | 19.6<br>(1.67)   | 19.0<br>(5.45)   | 20.25<br>(2.06)  | 13.0<br>(1.73)   | 17.14<br>(4.26)  | 14.0<br>(2.65)  | 12.0<br>(NA)    | 13.5<br>(2.38)  | 18.74<br>(5.38)   | 16.0<br>(5.07)    | 17.62<br>(5.35)   |
| > 12 education years                      | 22.5<br>(3.02)   | 21.4<br>(4.83)   | 22.0<br>(3.77)    | 23.12<br>(5.49)  | 30.0<br>(NA)  | 23.89<br>(5.62)  | 21.62<br>(3.58)   | 22.5<br>(3.54)   | 21.8<br>(3.39)   | 24.67<br>(4.16)  | 17.67<br>(4.51)  | 21.17<br>(5.46)  | 24.0<br>(NA)    | 19.0<br>(NA)    | 21.5<br>(3.54)  | 22.73<br>(4.03)   | 21.17<br>(4.95)   | 22.24<br>(4.33)   |
| total                                     | 20.67<br>(4.5)   | 18.44<br>(6.78)  | 19.71<br>(5.55)   | 23.2<br>(4.98)   | 30.0<br>(NA)  | 23.82<br>(5.15)  | 20.5<br>(5.58)    | 20.43<br>(2.44)  | 20.47<br>(4.59)  | 22.14<br>(3.67)  | 15.33<br>(3.98)  | 19.0<br>(5.08)   | 16.5<br>(5.45)  | 15.5<br>(4.95)  | 16.17<br>(4.79) | 21.04<br>(5.0)    | 18.48<br>(5.57)   | 20.13<br>(5.32)   |
| <b>Stroop Color Naming Test</b>           |                  |                  |                   |                  |               |                  |                   |                  |                  |                  |                  |                  |                 |                 |                 |                   |                   |                   |
| ≤ 12 education years                      | 74.83<br>(13.82) | 66.5<br>(15.93)  | 71.5<br>(14.46)   | 77.0<br>(12.73)  | NaN<br>(NA)   | 77.0<br>(12.73)  | 73.5<br>(16.46)   | 85.2<br>(8.11)   | 80.0<br>(13.13)  | 63.75<br>(18.46) | 63.67<br>(8.08)  | 63.71<br>(13.86) | 70.33<br>(11.5) | 65.0<br>(NA)    | 69.0<br>(9.76)  | 71.74<br>(14.15)  | 72.92<br>(14.12)  | 72.22<br>(13.92)  |
| > 12 education years                      | 89.83<br>(12.43) | 87.8<br>(10.57)  | 88.91<br>(11.09)  | 84.12<br>(6.42)  | 89.0<br>(NA)  | 84.67<br>(6.22)  | 80.0<br>(13.31)   | 80.0<br>(11.31)  | 80.0<br>(12.33)  | 82.33<br>(6.43)  | 72.67<br>(17.01) | 77.5<br>(12.66)  | 72.0<br>(NA)    | 63.0<br>(NA)    | 67.5<br>(6.36)  | 83.5<br>(10.7)    | 80.75<br>(13.42)  | 82.63<br>(11.52)  |
| total                                     | 82.33<br>(14.78) | 78.33<br>(16.64) | 80.62<br>(15.33)  | 82.7<br>(7.69)   | 89.0<br>(NA)  | 83.27<br>(7.54)  | 77.83<br>(14.03)  | 83.71<br>(8.46)  | 80.0<br>(12.36)  | 71.71<br>(16.82) | 68.17<br>(12.89) | 70.08<br>(14.63) | 70.75<br>(9.43) | 64.0<br>(1.41)  | 68.5<br>(8.12)  | 78.53<br>(13.47)  | 76.68<br>(14.08)  | 77.87<br>(13.62)  |
| <b>Stroop Word Reading Test</b>           |                  |                  |                   |                  |               |                  |                   |                  |                  |                  |                  |                  |                 |                 |                 |                   |                   |                   |
| ≤ 12 education years                      | 95.83<br>(14.47) | 77.25<br>(29.55) | 88.4<br>(22.35)   | 93.0<br>(12.73)  | NaN<br>(NA)   | 93.0<br>(12.73)  | 96.0<br>(19.58)   | 91.4<br>(30.56)  | 93.44<br>(24.83) | 87.25<br>(17.23) | 69.67<br>(22.01) | 79.71<br>(19.96) | 91.0<br>(7.21)  | 78.0<br>(NA)    | 87.75<br>(8.77) | 93.0<br>(14.11)   | 81.0<br>(26.32)   | 88.12<br>(20.48)  |
| > 12 education years                      | 102<br>(13.33)   | 114.6<br>(10.62) | 107.73<br>(13.31) | 97.75<br>(26.02) | 100.0<br>(NA) | 98.0<br>(24.35)  | 105.75<br>(14.93) | 101<br>(1.41)    | 104.8<br>(13.32) | 106.67<br>(5.03) | 87.67<br>(14.84) | 97.17<br>(14.37) | 97.0<br>(NA)    | 93.0<br>(NA)    | 95.0<br>(2.83)  | 102.19<br>(17.42) | 102.58<br>(14.73) | 102.32<br>(16.42) |
| total                                     | 98.92<br>(13.65) | 98.0<br>(27.77)  | 98.52<br>(20.28)  | 96.8<br>(23.42)  | 100.0<br>(NA) | 97.09<br>(22.24) | 102.5<br>(16.41)  | 94.14<br>(25.39) | 99.42<br>(19.92) | 95.57<br>(16.27) | 78.67<br>(19.47) | 87.77<br>(19.16) | 92.5<br>(6.61)  | 85.5<br>(10.61) | 90.17<br>(7.86) | 98.31<br>(16.58)  | 91.36<br>(23.81)  | 95.83<br>(19.59)  |

**Stroop Interference Test**

|                      |                  |                  |                  |                |              |                 |                  |                  |                  |                  |                 |                 |                 |                |                 |                  |                  |                  |
|----------------------|------------------|------------------|------------------|----------------|--------------|-----------------|------------------|------------------|------------------|------------------|-----------------|-----------------|-----------------|----------------|-----------------|------------------|------------------|------------------|
| ≤ 12 education years | 48.0<br>(11.54)  | 34.75<br>(9)     | 42.7<br>(12.16)  | 38.0<br>(2.83) | NaN<br>(NA)  | 38.0<br>(2.83)  | 38.75<br>(11.12) | 46.4<br>(17.36)  | 43.0<br>(14.6)   | 35.25<br>(9.54)  | 33.67<br>(4.04) | 34.57<br>(7.18) | 30.67<br>(5.51) | 35.0<br>(NA)   | 31.75<br>(4.99) | 39.58<br>(10.86) | 39.0<br>(12.68)  | 39.34<br>(11.44) |
| > 12 education years | 51.83<br>(24.41) | 54.2<br>(8.01)   | 52.91<br>(18.03) | 47.5<br>(7.07) | 50.0<br>(NA) | 47.78<br>(6.67) | 42.12<br>(8.39)  | 43.0<br>(8.49)   | 42.3<br>(7.93)   | 45.0<br>(10.0)   | 38.0<br>(10.82) | 41.5<br>(10.07) | 36.0<br>(NA)    | 34.0<br>(NA)   | 35.0<br>(1.41)  | 46.12<br>(13.37) | 46.25<br>(10.74) | 46.16<br>(12.45) |
| total                | 49.92<br>(18.31) | 45.56<br>(12.94) | 48.05<br>(16.01) | 45.6<br>(7.47) | 50.0<br>(NA) | 46.0<br>(7.21)  | 41.0<br>(9.02)   | 45.43<br>(14.68) | 42.63<br>(11.24) | 39.43<br>(10.29) | 35.83<br>(7.68) | 37.77<br>(9.0)  | 32.0<br>(5.23)  | 34.5<br>(0.71) | 32.83<br>(4.26) | 43.36<br>(12.67) | 42.48<br>(12.12) | 43.04<br>(12.39) |

**Trail Making Test - Part-A**

|                      |                 |                  |                  |                 |              |                 |                 |                 |                 |                 |                 |                 |                 |                 |                 |                  |                  |                 |
|----------------------|-----------------|------------------|------------------|-----------------|--------------|-----------------|-----------------|-----------------|-----------------|-----------------|-----------------|-----------------|-----------------|-----------------|-----------------|------------------|------------------|-----------------|
| ≤ 12 education years | 19.0<br>(4.0)   | 24.33<br>(5.86)  | 21.29<br>(5.25)  | 23.0<br>(0.0)   | NaN<br>(NA)  | 23.0<br>(0.0)   | 19.0<br>(7.21)  | 21.5<br>(6.81)  | 20.43<br>(6.5)  | 34.0<br>(5.72)  | 37.0<br>(12.73) | 35.0<br>(7.38)  | 40.33<br>(4.93) | 26.0<br>(NA)    | 36.75<br>(8.22) | 27.25<br>(10.02) | 25.9<br>(8.82)   | 26.73<br>(9.42) |
| > 12 education years | 19.33<br>(4.68) | 24.8<br>(14.65)  | 21.82<br>(10.25) | 19.75<br>(3.92) | 24.0<br>(NA) | 20.22<br>(3.93) | 23.12<br>(5.77) | 20.5<br>(3.54)  | 22.6<br>(5.34)  | 22.33<br>(1.53) | 30.0<br>(14.8)  | 26.17<br>(10.3) | 28.0<br>(NA)    | 42.0<br>(NA)    | 35.0<br>(9.9)   | 21.31<br>(4.78)  | 26.75<br>(12.35) | 23.03<br>(8.21) |
| total                | 19.2<br>(4.18)  | 24.62<br>(11.51) | 21.61<br>(8.46)  | 20.4<br>(3.72)  | 24.0<br>(NA) | 20.73<br>(3.69) | 22.0<br>(6.12)  | 21.17<br>(5.53) | 21.71<br>(5.75) | 29.0<br>(7.48)  | 32.8<br>(12.83) | 30.58<br>(9.71) | 37.25<br>(7.37) | 34.0<br>(11.31) | 36.17<br>(7.81) | 23.57<br>(7.7)   | 26.36<br>(10.65) | 24.53<br>(8.84) |

**Trail Making Test - Part-B**

|                      |                 |                  |                  |                  |              |                 |                 |                  |                  |                 |                 |                  |                   |                 |                 |                  |                 |                  |
|----------------------|-----------------|------------------|------------------|------------------|--------------|-----------------|-----------------|------------------|------------------|-----------------|-----------------|------------------|-------------------|-----------------|-----------------|------------------|-----------------|------------------|
| ≤ 12 education years | 37.75<br>(5.91) | 63.67<br>(44.56) | 48.86<br>(29.52) | 47.0<br>(8.49)   | NaN<br>(NA)  | 47.0<br>(8.49)  | 32.0<br>(13.08) | 59.25<br>(22.41) | 47.57<br>(22.81) | 58.5<br>(6.56)  | 98.0<br>(55.15) | 71.67<br>(32.41) | 106.33<br>(13.32) | 49.0<br>(NA)    | 92.0<br>(30.66) | 55.88<br>(28.11) | 67.3<br>(35.02) | 60.27<br>(30.78) |
| > 12 education years | 31.67<br>(5.2)  | 38.0<br>(12.63)  | 34.55<br>(9.4)   | 38.25<br>(10.15) | 38.0<br>(NA) | 38.22<br>(9.5)  | 42.62<br>(6.97) | 43.0<br>(7.07)   | 42.7<br>(6.58)   | 52.0<br>(1.73)  | 61.33<br>(6.03) | 56.67<br>(6.47)  | 58.0<br>(NA)      | 66.0<br>(NA)    | 62.0<br>(5.66)  | 40.42<br>(9.9)   | 47.0<br>(14.32) | 42.5<br>(11.7)   |
| total                | 34.1<br>(6.05)  | 47.62<br>(28.89) | 40.11<br>(20.27) | 40.0<br>(10.09)  | 38.0<br>(NA) | 39.82<br>(9.59) | 39.73<br>(9.63) | 53.83<br>(19.54) | 44.71<br>(15.02) | 55.71<br>(5.88) | 76.0<br>(34.38) | 64.17<br>(23.62) | 94.25<br>(26.5)   | 57.5<br>(12.02) | 82.0<br>(28.47) | 46.31<br>(20.16) | 56.23<br>(27.2) | 49.72<br>(23.1)  |

**Letter Fluency Test Total (the sum of all three letters)**

|                      |                  |                  |                  |                 |              |                  |                  |                 |                  |                  |                 |                  |                |                |                 |                  |                  |                  |
|----------------------|------------------|------------------|------------------|-----------------|--------------|------------------|------------------|-----------------|------------------|------------------|-----------------|------------------|----------------|----------------|-----------------|------------------|------------------|------------------|
| ≤ 12 education years | 29.5<br>(3.11)   | 19.67<br>(8.5)   | 25.29<br>(7.52)  | 34.0<br>(9.9)   | NaN<br>(NA)  | 34.0<br>(9.9)    | 46.67<br>(10.02) | 45.5<br>(9.29)  | 46.0<br>(8.77)   | 38.25<br>(9.6)   | 22.0<br>(9.9)   | 32.83<br>(12.06) | 41.0<br>(6.24) | 54.0<br>(NA)   | 44.25<br>(8.26) | 37.62<br>(9.14)  | 33.9<br>(16.11)  | 36.19<br>(12.12) |
| > 12 education years | 48.17<br>(13.14) | 40.0<br>(9.27)   | 44.45<br>(11.78) | 50.5<br>(13.02) | 47.0<br>(NA) | 50.11<br>(12.23) | 44.5<br>(13.24)  | 57.5<br>(27.58) | 47.1<br>(15.84)  | 47.33<br>(14.5)  | 30.67<br>(8.02) | 39.0<br>(13.9)   | 41.0<br>(NA)   | 45.0<br>(NA)   | 43.0<br>(2.83)  | 47.38<br>(12.47) | 41.58<br>(13.98) | 45.55<br>(13.06) |
| total                | 40.7<br>(13.86)  | 32.38<br>(13.44) | 37.0<br>(13.93)  | 47.2<br>(13.82) | 47.0<br>(NA) | 47.18<br>(13.11) | 45.09<br>(12)    | 49.5<br>(15.57) | 46.65<br>(13.05) | 42.14<br>(11.82) | 27.2<br>(8.9)   | 35.92<br>(12.82) | 41.0<br>(5.1)  | 49.5<br>(6.36) | 43.83<br>(6.55) | 43.67<br>(12.18) | 38.09<br>(15.13) | 41.75<br>(13.42) |

**Letter Fluency Test - 1. Letter**

|                      |                 |                |                 |                |              |                 |                 |                 |                 |                 |                 |                 |                |                |                |                 |                 |                 |
|----------------------|-----------------|----------------|-----------------|----------------|--------------|-----------------|-----------------|-----------------|-----------------|-----------------|-----------------|-----------------|----------------|----------------|----------------|-----------------|-----------------|-----------------|
| ≤ 12 education years | 13.0<br>(1.15)  | 6.67<br>(3.51) | 10.29<br>(4.03) | 12.5<br>(3.54) | NaN<br>(NA)  | 12.5<br>(3.54)  | 17.33<br>(5.13) | 17.0<br>(3.74)  | 17.14<br>(3.98) | 16.25<br>(3.86) | 10.5<br>(4.95)  | 14.33<br>(4.76) | 17.0<br>(2.65) | 21.0<br>(NA)   | 18.0<br>(2.94) | 15.31<br>(3.55) | 13.0<br>(6.25)  | 14.42<br>(4.79) |
| > 12 education years | 18.33<br>(5.05) | 15.2<br>(2.86) | 16.91<br>(4.32) | 19.5<br>(5.88) | 24.0<br>(NA) | 20.0<br>(5.7)   | 16.12<br>(5.36) | 21.0<br>(7.07)  | 17.1<br>(5.67)  | 17.67<br>(9.07) | 12.33<br>(4.73) | 15.0<br>(7.1)   | 13.0<br>(NA)   | 17.0<br>(NA)   | 15.0<br>(2.83) | 17.73<br>(5.67) | 16.33<br>(5.09) | 17.29<br>(5.47) |
| total                | 16.2<br>(4.71)  | 12.0<br>(5.26) | 14.33<br>(5.27) | 18.1<br>(6.08) | 24.0<br>(NA) | 18.64<br>(6.04) | 16.45<br>(5.07) | 18.33<br>(4.76) | 17.12<br>(4.9)  | 16.86<br>(5.96) | 11.6<br>(4.28)  | 14.67<br>(5.77) | 16.0<br>(2.94) | 19.0<br>(2.83) | 17.0<br>(3.03) | 16.81<br>(5.07) | 14.82<br>(5.76) | 16.12<br>(5.36) |

**Letter Fluency Test - 2. Letter**

|                                        |                 |                 |                 |                 |              |                 |                 |                 |                 |                 |                 |                 |                 |                |                 |                 |                 |                 |
|----------------------------------------|-----------------|-----------------|-----------------|-----------------|--------------|-----------------|-----------------|-----------------|-----------------|-----------------|-----------------|-----------------|-----------------|----------------|-----------------|-----------------|-----------------|-----------------|
| ≤ 12 education years                   | 8.75<br>(1.89)  | 6.0<br>(4.36)   | 7.57<br>(3.21)  | 9.5<br>(4.95)   | NaN<br>(NA)  | 9.5<br>(4.95)   | 16.33<br>(1.53) | 15.25<br>(3.2)  | 15.71<br>(2.5)  | 10.25<br>(3.4)  | 6.0<br>(4.24)   | 8.83<br>(3.92)  | 10.67<br>(1.15) | 19.0<br>(NA)   | 12.75<br>(4.27) | 11.0<br>(3.56)  | 11.0<br>(6.22)  | 11.0<br>(4.64)  |
| > 12 education years                   | 15.5<br>(5.13)  | 14.4<br>(3.29)  | 15.0<br>(4.22)  | 16.62<br>(4.96) | 13.0<br>(NA) | 16.22<br>(4.79) | 14.5<br>(5.15)  | 18.5<br>(12.02) | 15.3<br>(6.29)  | 15.33<br>(8.08) | 10.33<br>(3.51) | 12.83<br>(6.21) | 15.0<br>(NA)    | 14.0<br>(NA)   | 14.5<br>(0.71)  | 15.5<br>(5.05)  | 13.92<br>(5.18) | 15.0<br>(5.08)  |
| total                                  | 12.8<br>(5.29)  | 11.25<br>(5.52) | 12.11<br>(5.29) | 15.2<br>(5.55)  | 13.0<br>(NA) | 15.0<br>(5.31)  | 15.0<br>(4.45)  | 16.33<br>(6.15) | 15.47<br>(4.96) | 12.43<br>(5.91) | 8.6<br>(4.04)   | 10.83<br>(5.37) | 11.75<br>(2.36) | 16.5<br>(3.54) | 13.33<br>(3.44) | 13.79<br>(5.01) | 12.59<br>(5.73) | 13.38<br>(5.25) |
| <b>Letter Fluency Test - 3. Letter</b> |                 |                 |                 |                 |              |                 |                 |                 |                 |                 |                 |                 |                 |                |                 |                 |                 |                 |
| ≤ 12 education years                   | 7.75<br>(1.71)  | 7.0<br>(1.0)    | 7.43<br>(1.4)   | 12.0<br>(1.41)  | NaN<br>(NA)  | 12.0<br>(1.41)  | 13.0<br>(3.46)  | 13.25<br>(3.3)  | 13.14<br>(3.08) | 11.75<br>(6.5)  | 5.5<br>(0.71)   | 9.67<br>(5.99)  | 13.33<br>(4.16) | 14.0<br>(NA)   | 13.5<br>(3.42)  | 11.31<br>(4.24) | 9.9<br>(4.23)   | 10.77<br>(4.21) |
| > 12 education years                   | 14.33<br>(4.46) | 10.4<br>(3.91)  | 12.55<br>(4.5)  | 14.38<br>(3.58) | 10.0<br>(NA) | 13.89<br>(3.66) | 13.88<br>(3.91) | 18.0<br>(8.49)  | 14.7<br>(4.79)  | 14.33<br>(4.93) | 8.0<br>(1.73)   | 11.17<br>(4.79) | 13.0<br>(NA)    | 14.0<br>(NA)   | 13.5<br>(0.71)  | 14.15<br>(3.73) | 11.33<br>(5.0)  | 13.26<br>(4.31) |
| total                                  | 11.7<br>(4.85)  | 9.12<br>(3.48)  | 10.56<br>(4.38) | 13.9<br>(3.35)  | 10.0<br>(NA) | 13.55<br>(3.39) | 13.64<br>(3.64) | 14.83<br>(5.19) | 14.06<br>(4.13) | 12.86<br>(5.58) | 7.0<br>(1.87)   | 10.42<br>(5.23) | 13.25<br>(3.4)  | 14.0<br>(0.0)  | 13.5<br>(2.66)  | 13.07<br>(4.12) | 10.68<br>(4.61) | 12.25<br>(4.41) |

Note: Symbol Digit Modalities Test (min.-max.: 0–110 points in 90 sec); Category fluency (number of correct words - animals in 60 sec); Stroop in each test (min.-max.: 0–200 in 45 sec); Trail Making Test, Part A and Part B (both time in sec, max. 240 sec, the longer time elapsed, the worse performance); Letter fluency test (number of correct words for three letters in 60 sec each, i.e. in total 180 sec), NaN = no participant was available for this cell, NA = the cell is derived from a single participant



### Supplementary Material Figure 1

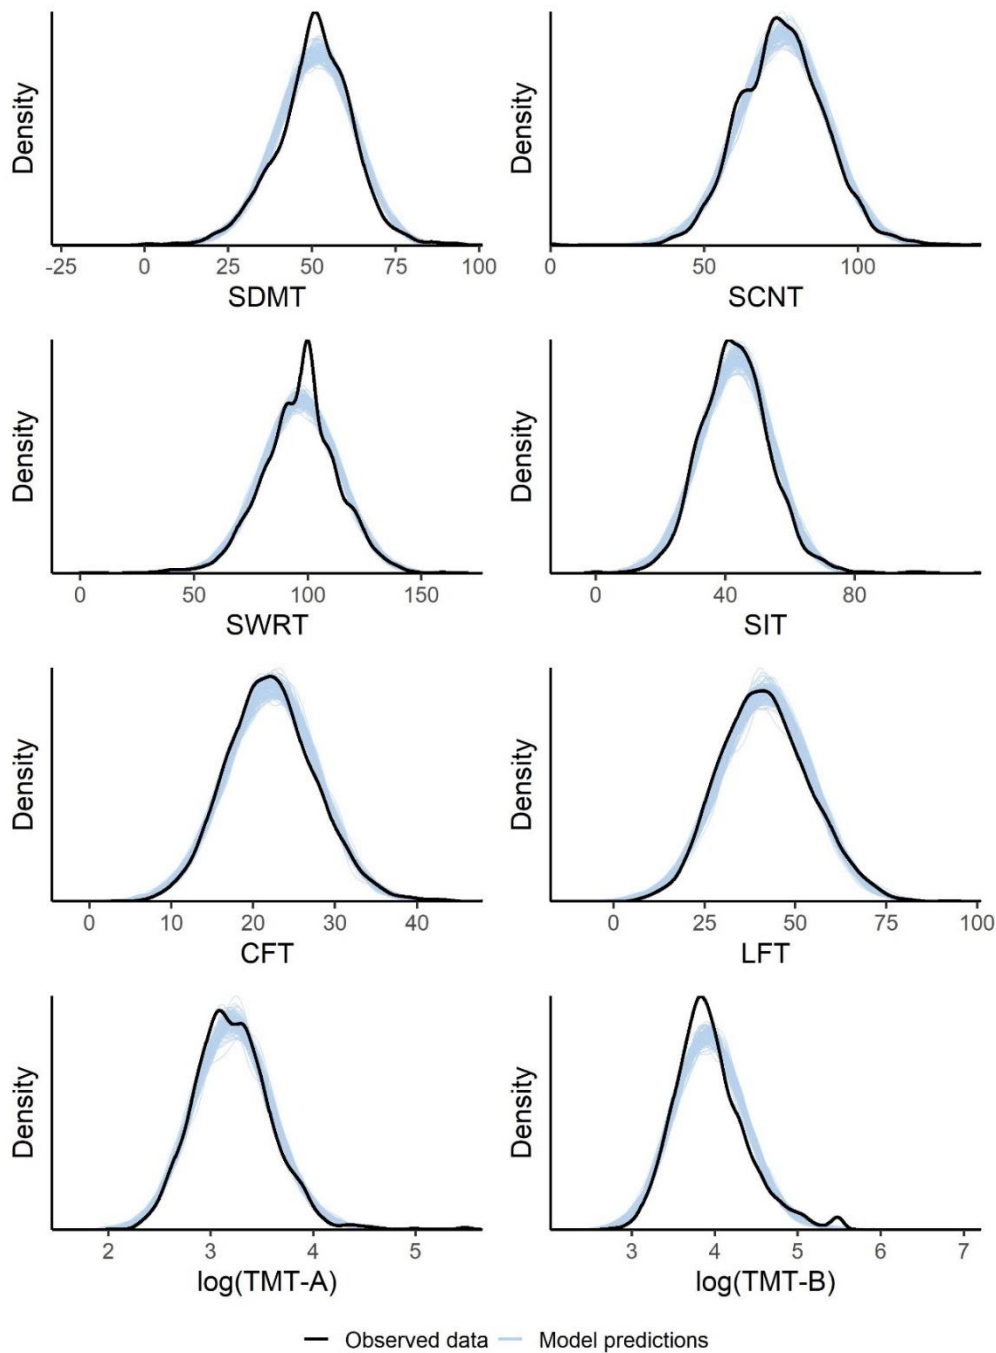

**Posterior predictive checks of models used to generate normative z-values:** SDMT: Symbol Digit Modalities Test, SCNT: Stroop Color Naming Test; SWRT: Stroop Word Reading Test, SIT: Stroop Interference Test, CFT: Category Fluency, VFT: Verbal Fluency Test; TMT-A = Trail Making Test, Part A; TMT-B = Trail Making Test, Part B.

**Supplementary Material Figure 2**

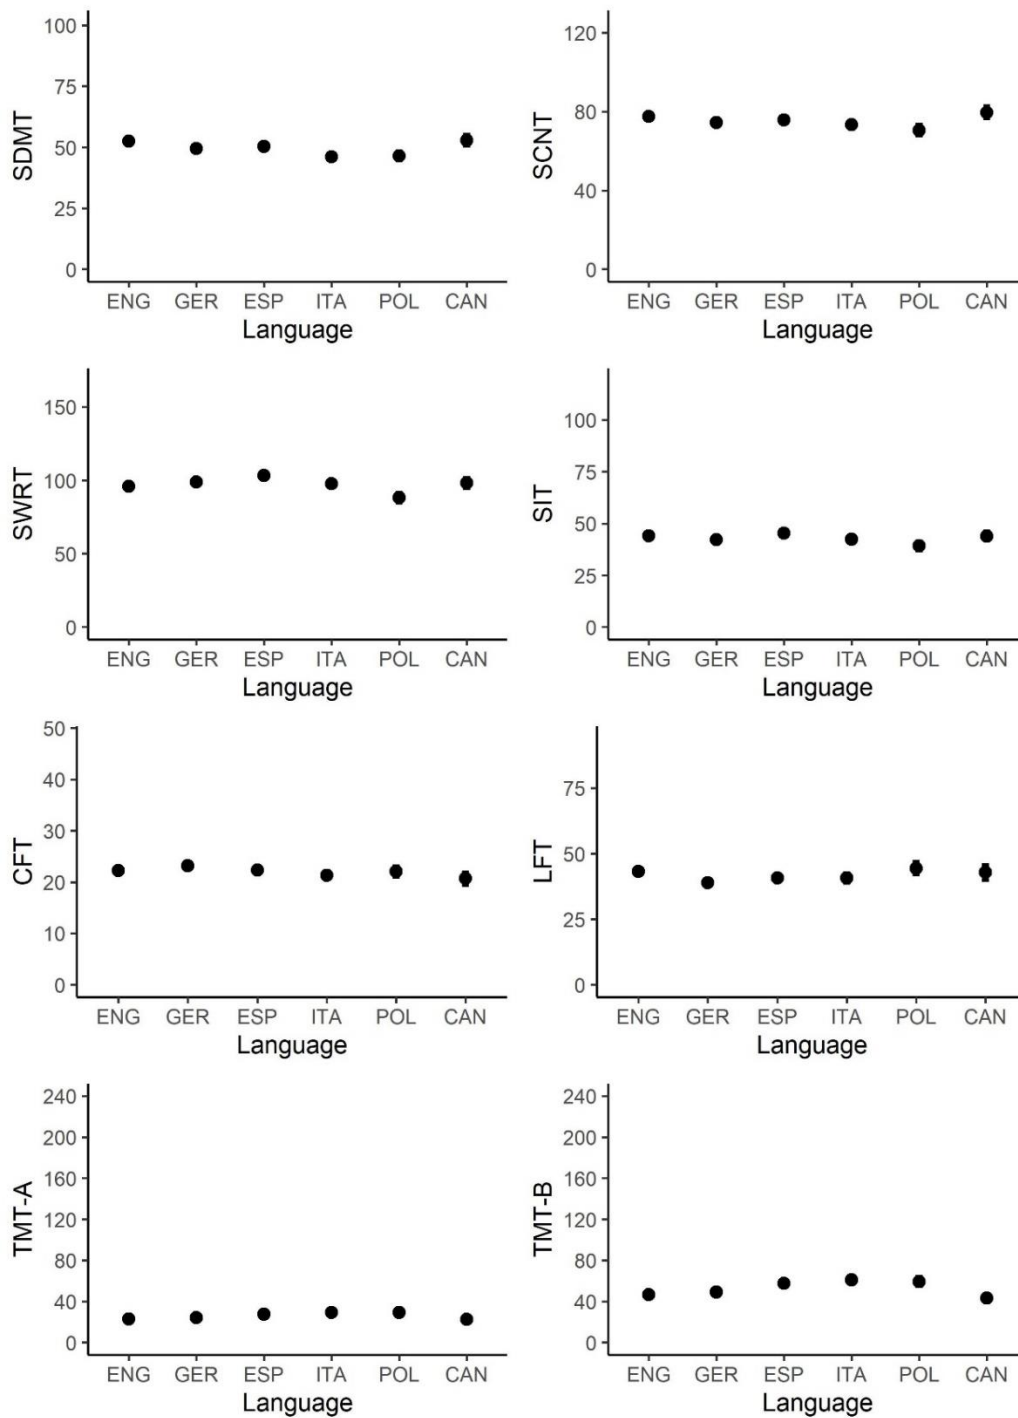

**Language differences in tested cognitive measures:** Points represent mean estimates of the average performance based on language when age and education are held at median value with respect to the normative sample (i.e., 48 years of age and 14 years of formal education), whiskers estimate 95% posterior probability intervals (PPIs) of the means (in most cases, the mean point covers entire 95% , PPI whiskers).

**Supplementary Material Figure 3**

### A

#### HD Neuropsychological Assessments Normative Calculator

[Calculator](#) [About](#)

**Demographic Data:**  
 Age:  years  
 Gender:  male  female  
 Language:    
 Education:  years

**Neuropsychological Assessment Results:**

|                                 | Value:                       | Z-Score:             | Percentile:            | Rating:              |
|---------------------------------|------------------------------|----------------------|------------------------|----------------------|
| SDMT:                           | <input type="text"/> symbols | <input type="text"/> | <input type="text"/> % | <input type="text"/> |
| Letter Fluency (3 Minutes):     | <input type="text"/> words   | <input type="text"/> | <input type="text"/> % | <input type="text"/> |
| Categorical Fluency (Animals):  | <input type="text"/> words   | <input type="text"/> | <input type="text"/> % | <input type="text"/> |
| Trail Making Test A:            | <input type="text"/> seconds | <input type="text"/> | <input type="text"/> % | <input type="text"/> |
| Trail Making Test B:            | <input type="text"/> seconds | <input type="text"/> | <input type="text"/> % | <input type="text"/> |
| Stroop Colour Naming (45s):     | <input type="text"/> items   | <input type="text"/> | <input type="text"/> % | <input type="text"/> |
| Stroop Word Reading (45s):      | <input type="text"/> items   | <input type="text"/> | <input type="text"/> % | <input type="text"/> |
| Stroop Interference Test (45s): | <input type="text"/> items   | <input type="text"/> | <input type="text"/> % | <input type="text"/> |

**Summary:**  
 Downloadable Report: [W](#)

### B

#### HD Neuropsychological Assessments Normative Calculator

[Calculator](#) [About](#)

**Demographic Data:**  
 Age:  years  
 Gender:  male  female  
 Language:    
 Education:  years

**Neuropsychological Assessment Results:**

|                                 | Value:                                  | Z-Score: | Percentile: | Rating:             |
|---------------------------------|-----------------------------------------|----------|-------------|---------------------|
| SDMT:                           | <input type="text" value="45"/> symbols | -1.09    | 13.7 %      | Low Average         |
| Letter Fluency (3 Minutes):     | <input type="text" value="10"/> words   | -2.47    | 0.68 %      | Severely Impaired   |
| Categorical Fluency (Animals):  | <input type="text" value="14"/> words   | -1.78    | 3.77 %      | Mildly Impaired     |
| Trail Making Test A:            | <input type="text" value="20"/> seconds | 0.29     | 61.6 %      | Average             |
| Trail Making Test B:            | <input type="text" value="49"/> seconds | -0.25    | 40.08 %     | Average             |
| Stroop Colour Naming (45s):     | <input type="text" value="60"/> items   | -1.28    | 9.95 %      | Low Average         |
| Stroop Word Reading (45s):      | <input type="text" value="68"/> items   | -2.08    | 1.86 %      | Moderately Impaired |
| Stroop Interference Test (45s): | <input type="text" value="36"/> items   | -0.99    | 16.22 %     | Low Average         |

**Summary:**  
 Downloadable Report: [W](#)

### C

#### Neuropsychological Assessment Results:

Patient: 32 years, female, 14 years of education.  
 Assessments have been conducted in German.

|                               | Value      | Z-Score | Percentile | Rating              |
|-------------------------------|------------|---------|------------|---------------------|
| SDMT                          | 45 symbols | -1.09   | 13.7 %     | Low Average         |
| Letter Fluency (3 Minutes)    | 10 words   | -2.47   | 0.68 %     | Severely Impaired   |
| Categorical Fluency (Animals) | 14 words   | -1.78   | 3.77 %     | Mildly Impaired     |
| Trail Making Test A           | 20 seconds | 0.29    | 61.6 %     | Average             |
| Trail Making Test B           | 49 items   | -0.25   | 40.08 %    | Average             |
| Stroop Colour Naming (45s)    | 60 items   | -1.28   | 9.95 %     | Low Average         |
| Stroop Word Reading (45s)     | 68 items   | -2.08   | 1.86 %     | Moderately Impaired |
| Stroop Interference Test(45s) | 36 items   | -0.99   | 16.22 %    | Low Average         |

**The normative calculator:** From upper left to right: A) Entry forms (demographics and raw values obtained for each cognitive test) with automatic export function including a downloadable report in RTF format, B) Example output for a 32-year-old HD patient, C) Downloadable report in RTF-format

**Supplementary Material Figure 4**

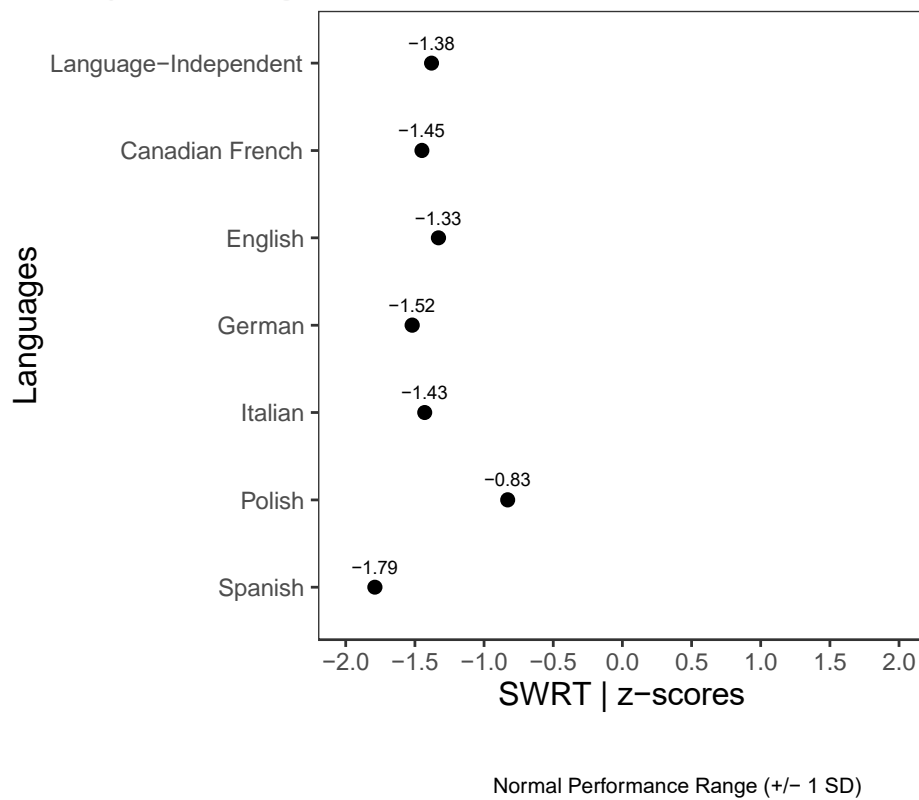

**Illustrative Case Study:** 32-years old female manifest HD patient, graph showing language-dependent differences in evaluating performance on Stroop Word Reading Test.
